# Supplementary material for: Distinct functions and transcriptional signatures in orally induced regulatory T cell populations
Source: Front Immunol. 2023 Oct 26;14:1278184. doi: 10.3389/fimmu.2023.1278184 (PMC10637621; doi:10.3389/fimmu.2023.1278184)
Supplement: Supplementary file 3 [file DataSheet_3.xlsx]

## Sheet: Integrated UMAP cluster list
	p_val	avg_log2FC	pct.1	pct.2	p_val_adj	cluster	gene
1	1.45e-153	0.837201	0.681	0.522	2.36e-149	0	Klf2
2	2.97e-131	0.758975	0.646	0.47	4.83e-127	0	S1pr1
3	2.37e-85	0.638157	0.622	0.481	3.86e-81	0	Sell
4	3.27e-60	0.620601	0.437	0.322	5.33e-56	0	Satb1
5	1.35e-96	0.587123	0.777	0.712	2.21e-92	0	Smc6
6	6.43e-36	0.561941	0.467	0.413	1.05e-31	0	Lef1
7	1.84e-22	0.533816	0.268	0.21	2.99e-18	0	Tsc22d3
8	3.19e-33	0.522702	0.398	0.326	5.19e-29	0	Txk
9	1.51e-46	0.510848	0.619	0.572	2.47e-42	0	Atp1b3
10	7.63e-239	0.50774	0.985	0.98	1.24e-234	0	Rpl8
11	0	0.469306	1	0.996	0	0	Rps24
12	7.06e-21	0.461179	0.343	0.292	1.15e-16	0	Arl4c
13	9.17e-295	0.455228	0.996	0.989	1.49e-290	0	Rps19
14	1.61e-28	0.442758	0.578	0.581	2.62e-24	0	Npc2
15	1.12e-232	0.43839	0.997	0.99	1.83e-228	0	Rps20
16	0	0.429138	0.998	0.993	0	0	Rps16
17	1.51e-15	0.428386	0.408	0.38	2.46e-11	0	Stk38
18	9.06e-19	0.425576	0.36	0.309	1.48e-14	0	Gm2682
19	1.65e-13	0.420436	0.339	0.303	2.69e-09	0	1700097N02Rik
20	0	0.41229	1	0.998	0	0	Rps29
21	1.38e-29	0.410182	0.566	0.517	2.26e-25	0	Emp3
22	0	0.407233	0.998	0.992	0	0	Rpl35a
23	1.06e-226	0.400492	0.995	0.989	1.72e-222	0	Rps3a1
24	1.87e-10	0.397924	0.256	0.226	3.04e-06	0	A930005H10Rik
25	1.38e-08	0.380248	0.41	0.419	0.00022529	0	Rps27rt
26	2.42e-13	0.370361	0.461	0.442	3.95e-09	0	Ripor2
27	4.28e-13	0.367533	0.326	0.288	6.96e-09	0	Ccr7
28	1.15e-175	0.363218	0.99	0.988	1.88e-171	0	Rps7
29	5.01e-163	0.36046	0.998	0.993	8.15e-159	0	Rps8
30	2.64e-06	0.358161	0.257	0.239	0.0429152	0	Actn1
31	6.76e-238	0.357626	1	0.993	1.1e-233	0	Rps28
32	7.23e-154	0.35358	0.999	0.991	1.18e-149	0	Tmsb10
33	5.13e-223	0.35296	1	0.997	8.35e-219	0	Rps27
34	5.92e-132	0.350586	0.988	0.983	9.64e-128	0	Rps5
35	1.25e-178	0.345889	0.995	0.99	2.04e-174	0	Rpl9
36	1.05e-136	0.334298	0.99	0.985	1.71e-132	0	Rpl12
37	1.89e-205	0.329876	0.996	0.99	3.08e-201	0	Rps10
38	3.61e-127	0.329199	0.99	0.983	5.87e-123	0	Rps4x
39	1.6e-147	0.327146	0.998	0.994	2.61e-143	0	Rpl13
40	2.01e-142	0.325416	0.985	0.982	3.27e-138	0	Rps18
41	1.32e-133	0.323877	0.985	0.981	2.15e-129	0	Rps3
42	2.15e-17	0.323074	0.599	0.61	3.5e-13	0	Rabac1
43	3.23e-16	0.320362	0.618	0.62	5.26e-12	0	Txnip
44	8.13e-99	0.317119	0.971	0.969	1.32e-94	0	Uba52
45	4.23e-07	0.315622	0.476	0.489	0.00688761	0	4930523C07Rik
46	1.1e-44	0.315092	0.883	0.91	1.79e-40	0	Rpl14
47	3.29e-161	0.311655	0.996	0.988	5.37e-157	0	Rps11
48	6.53e-16	0.30929	0.606	0.606	1.06e-11	0	Cytip
49	1.97e-83	0.308388	0.958	0.958	3.21e-79	0	Rpl7
50	6.43e-212	0.307309	0.998	0.993	1.05e-207	0	Rpl30
51	4.34e-09	0.306221	0.34	0.315	7.06e-05	0	Kbtbd11
52	2.81e-224	0.304503	1	0.996	4.57e-220	0	Rps21
53	1.45e-202	0.294357	0.999	0.996	2.36e-198	0	Tpt1
54	7.83e-109	0.293889	0.984	0.98	1.28e-104	0	Rpl18
55	1.62e-128	0.293519	0.982	0.981	2.63e-124	0	Rpl21
56	4.28e-131	0.290992	0.993	0.99	6.98e-127	0	Rpl19
57	5.67e-06	0.286927	0.494	0.53	0.0923748	0	Gm11808
58	1.47e-40	0.286626	0.874	0.828	2.4e-36	0	Ms4a4b
59	1.22e-75	0.283821	0.991	0.981	1.99e-71	0	Rpl35
60	2.95e-85	0.280795	0.962	0.961	4.8e-81	0	Rpl36a
61	1.84e-53	0.275438	0.978	0.974	2.99e-49	0	Rplp0
62	3.02e-130	0.26882	0.998	0.99	4.92e-126	0	Rpl32
63	1.39e-130	0.267839	0.995	0.992	2.26e-126	0	Rpl18a
64	4.11e-117	0.266164	0.996	0.993	6.69e-113	0	Rpl23
65	4.99e-73	0.263328	0.961	0.965	8.13e-69	0	Rpl13a
66	2.45e-51	0.263107	0.933	0.944	4e-47	0	Rpl3
67	1.7e-64	0.257517	0.95	0.956	2.77e-60	0	Rps25
68	1.77e-101	0.253383	0.99	0.985	2.88e-97	0	Rps26
69	6.51e-108	0.251917	0.997	0.992	1.06e-103	0	Rps27a
70	0.00142097	0.25081	0.287	0.282	1	0	Smad7
71	8.39e-167	1.12791	0.455	0.198	1.37e-162	1	Iigp1
72	1.04e-143	0.854435	0.564	0.308	1.69e-139	1	Gbp7
73	2.68e-151	0.808586	0.761	0.516	4.37e-147	1	Stat1
74	5.8e-100	0.707569	0.483	0.271	9.44e-96	1	Gbp4
75	1.68e-100	0.702703	0.407	0.206	2.74e-96	1	Igtp
76	8.91e-127	0.69053	0.792	0.579	1.45e-122	1	Samhd1
77	2.17e-91	0.574691	0.619	0.391	3.54e-87	1	Il2ra
78	4.03e-106	0.563273	0.721	0.479	6.56e-102	1	Sell
79	1.17e-86	0.558669	0.719	0.527	1.91e-82	1	Ifi203
80	2.12e-78	0.539263	0.617	0.417	3.46e-74	1	Samd9l
81	1e-65	0.537186	0.479	0.305	1.63e-61	1	Ifi47
82	1.66e-144	0.53531	0.959	0.814	2.71e-140	1	Ms4a4b
83	9.27e-84	0.505842	0.615	0.407	1.51e-79	1	Dnah8
84	1.69e-63	0.50568	0.38	0.219	2.75e-59	1	Parp14
85	6.26e-77	0.494851	0.679	0.501	1.02e-72	1	Macf1
86	3.05e-53	0.491328	0.33	0.186	4.97e-49	1	Slfn5
87	6.23e-55	0.490011	0.382	0.232	1.01e-50	1	Slfn1
88	8.56e-63	0.485362	0.253	0.121	1.39e-58	1	Irgm1
89	2.59e-64	0.470541	0.458	0.284	4.22e-60	1	9930111J21Rik2
90	6.01e-58	0.470192	0.273	0.139	9.79e-54	1	Gbp3
91	1.18e-82	0.468808	0.496	0.284	1.93e-78	1	Gm2682
92	5.37e-63	0.466222	0.337	0.183	8.74e-59	1	Dtx3l
93	1.68e-87	0.451672	0.707	0.483	2.73e-83	1	S1pr1
94	1.84e-70	0.44947	0.327	0.163	3e-66	1	Gm4070
95	9.5e-84	0.441476	0.849	0.704	1.55e-79	1	Smc6
96	4.8e-54	0.439712	0.612	0.452	7.81e-50	1	Resf1
97	5.87e-41	0.425701	0.429	0.29	9.56e-37	1	Irf1
98	2.77e-59	0.425032	0.724	0.563	4.51e-55	1	Mndal
99	3.52e-62	0.413774	0.712	0.531	5.73e-58	1	Foxp1
100	1.64e-62	0.413232	0.516	0.337	2.67e-58	1	Prkcq
101	8.53e-59	0.409145	0.59	0.414	1.39e-54	1	Ripor2
102	1.48e-46	0.406598	0.254	0.135	2.42e-42	1	Gbp5
103	5.53e-53	0.397291	0.458	0.293	9.01e-49	1	Wdr82
104	1.38e-52	0.391671	0.635	0.476	2.25e-48	1	Rapgef6
105	4e-56	0.390842	0.608	0.43	6.52e-52	1	Bcl2
106	2.43e-54	0.390256	0.749	0.599	3.96e-50	1	Bcl11b
107	2.8e-59	0.389502	0.467	0.288	4.56e-55	1	Kbtbd11
108	2.85e-54	0.385812	0.401	0.24	4.64e-50	1	Pitpnc1
109	2.57e-59	0.384578	0.697	0.531	4.18e-55	1	Ablim1
110	8.1e-50	0.383737	0.549	0.396	1.32e-45	1	Nsd3
111	8.26e-61	0.376388	0.781	0.609	1.35e-56	1	Gimap4
112	3.79e-45	0.374587	0.323	0.192	6.17e-41	1	Irf9
113	2.57e-61	0.368385	0.839	0.705	4.19e-57	1	Ms4a6b
114	3.25e-44	0.364957	0.482	0.329	5.29e-40	1	Satb1
115	1.85e-30	0.36489	0.265	0.167	3.01e-26	1	Zbp1
116	9.2e-46	0.363045	0.556	0.4	1.5e-41	1	Kmt2a
117	1.45e-43	0.361143	0.515	0.368	2.36e-39	1	Utrn
118	1.31e-49	0.354719	0.403	0.249	2.13e-45	1	Trib2
119	8.27e-51	0.352974	0.368	0.216	1.35e-46	1	Itga6
120	1.33e-52	0.351896	0.779	0.644	2.16e-48	1	Prrc2c
121	3.1e-48	0.34593	0.723	0.565	5.05e-44	1	Cd47
122	1.35e-36	0.345037	0.457	0.324	2.2e-32	1	Kcnq1ot1
123	1.62e-51	0.344809	0.425	0.263	2.63e-47	1	Grap2
124	8.93e-52	0.343264	0.732	0.576	1.45e-47	1	Cytip
125	5.54e-49	0.341141	0.699	0.544	9.02e-45	1	Sp100
126	2.95e-34	0.340658	0.444	0.318	4.8e-30	1	Smchd1
127	1.02e-49	0.336481	0.671	0.503	1.66e-45	1	Peli1
128	1.24e-50	0.334338	0.296	0.16	2.02e-46	1	Sidt1
129	1.51e-44	0.331719	0.443	0.29	2.46e-40	1	Evl
130	1.04e-47	0.329917	0.768	0.617	1.7e-43	1	Inpp4b
131	6.8e-48	0.327808	0.556	0.393	1.11e-43	1	Dgka
132	1e-52	0.32387	0.754	0.587	1.64e-48	1	Txnip
133	6.54e-41	0.316493	0.353	0.218	1.07e-36	1	Actn1
134	1.01e-36	0.315347	0.295	0.177	1.64e-32	1	Slfn8
135	9.73e-39	0.312929	0.317	0.194	1.58e-34	1	Larp1
136	9.46e-55	0.306207	0.89	0.776	1.54e-50	1	Gimap3
137	9.95e-49	0.305958	0.714	0.556	1.62e-44	1	Atp1b3
138	1.96e-34	0.305807	0.37	0.245	3.19e-30	1	Il6ra
139	1.12e-29	0.30559	0.527	0.415	1.83e-25	1	Ankrd11
140	7.6e-35	0.301923	0.5	0.366	1.24e-30	1	Bptf
141	3.77e-34	0.300028	0.559	0.425	6.15e-30	1	Tnrc6b
142	2.35e-35	0.299083	0.382	0.251	3.83e-31	1	Socs1
143	1.49e-33	0.295958	0.288	0.177	2.43e-29	1	Sipa1l1
144	2.15e-35	0.294266	0.436	0.303	3.5e-31	1	Add3
145	4.62e-35	0.294032	0.498	0.364	7.52e-31	1	Tut4
146	2.34e-39	0.291996	0.302	0.179	3.81e-35	1	Arhgef18
147	4.56e-26	0.289885	0.555	0.445	7.43e-22	1	Chd2
148	2.61e-36	0.287064	0.545	0.403	4.25e-32	1	Lef1
149	2.52e-29	0.286585	0.346	0.233	4.1e-25	1	Pik3cd
150	3.08e-30	0.285463	0.45	0.327	5.01e-26	1	Ssh2
151	3.97e-31	0.284926	0.351	0.235	6.47e-27	1	Efr3a
152	5.78e-39	0.283219	0.537	0.391	9.42e-35	1	Phf20l1
153	2.53e-32	0.281617	0.396	0.27	4.13e-28	1	Setx
154	6.25e-34	0.280161	0.511	0.377	1.02e-29	1	Ankrd44
155	1.45e-34	0.280136	0.341	0.22	2.36e-30	1	Arap2
156	2.67e-38	0.279301	0.688	0.549	4.35e-34	1	Chd3
157	4.47e-29	0.276379	0.421	0.3	7.29e-25	1	Celf1
158	1.48e-25	0.275737	0.328	0.227	2.41e-21	1	Usp25
159	8.77e-33	0.275379	0.342	0.224	1.43e-28	1	Kmt2c
160	1.16e-28	0.272625	0.36	0.246	1.89e-24	1	Rbms1
161	2.3e-25	0.270597	0.408	0.301	3.74e-21	1	Casp8
162	5.69e-26	0.270345	0.44	0.326	9.26e-22	1	Pum2
163	2.32e-29	0.268892	0.49	0.369	3.78e-25	1	Ikzf1
164	4.25e-33	0.267989	0.39	0.261	6.93e-29	1	Asxl2
165	3.22e-31	0.267869	0.503	0.372	5.24e-27	1	Dock10
166	2.48e-34	0.267735	0.532	0.392	4.03e-30	1	Arid1a
167	9.06e-31	0.267086	0.347	0.232	1.48e-26	1	Kat6a
168	1.14e-30	0.266515	0.6	0.476	1.86e-26	1	Crlf3
169	4.38e-30	0.26432	0.419	0.296	7.13e-26	1	Etnk1
170	1.5e-38	0.263172	0.815	0.664	2.44e-34	1	Ccnd2
171	3.86e-23	0.262972	0.399	0.295	6.29e-19	1	Sp110
172	1.83e-50	0.262952	0.955	0.878	2.98e-46	1	Mbnl1
173	2.03e-24	0.262515	0.259	0.168	3.31e-20	1	Mtmr3
174	5.47e-32	0.25987	0.428	0.3	8.9e-28	1	Zc3hav1
175	6.36e-28	0.259042	0.517	0.393	1.04e-23	1	Nipbl
176	8.84e-18	0.25751	0.273	0.195	1.44e-13	1	Trim30a
177	4.26e-24	0.257287	0.429	0.322	6.94e-20	1	Rbbp6
178	1.14e-31	0.257207	0.386	0.263	1.86e-27	1	Ncoa3
179	2.87e-25	0.255919	0.505	0.389	4.68e-21	1	Birc6
180	2.02e-34	0.25563	0.595	0.458	3.29e-30	1	4930523C07Rik
181	1.28e-28	0.254281	0.482	0.359	2.09e-24	1	Prpf38b
182	7.88e-29	0.253888	0.406	0.285	1.28e-24	1	Arl4c
183	2.27e-29	0.253507	0.496	0.374	3.7e-25	1	Atf7ip
184	2.33e-31	0.253195	0.58	0.446	3.8e-27	1	Selplg
185	7.29e-30	0.253045	0.442	0.32	1.19e-25	1	Zfp292
186	8.73e-33	0.252611	0.463	0.33	1.42e-28	1	4932438A13Rik
187	3.68e-27	0.25242	0.482	0.366	6e-23	1	Atp11b
188	4.69e-52	0.252017	0.987	0.945	7.64e-48	1	Rps15
189	1.03e-26	0.250808	0.365	0.254	1.68e-22	1	Phip
190	1.82e-170	1.05037	0.374	0.138	2.97e-166	2	Sapcd1
191	1.92e-190	0.926823	0.803	0.576	3.12e-186	2	Izumo1r
192	2.01e-133	0.707756	0.869	0.744	3.27e-129	2	AW112010
193	4.43e-52	0.701915	0.454	0.319	7.22e-48	2	BE692007
194	6.92e-121	0.670986	0.833	0.641	1.13e-116	2	Ikzf2
195	2.59e-50	0.620024	0.466	0.334	4.21e-46	2	2310001H17Rik
196	7.68e-41	0.56193	0.438	0.32	1.25e-36	2	Sh3bgrl
197	4.65e-64	0.541371	0.484	0.316	7.57e-60	2	Ctla4
198	4.56e-37	0.529359	0.387	0.276	7.43e-33	2	Mxd4
199	2.75e-36	0.520462	0.359	0.247	4.48e-32	2	Tiam1
200	1.37e-30	0.511383	0.276	0.181	2.23e-26	2	A630023P12Rik
201	3.12e-28	0.498254	0.372	0.277	5.08e-24	2	Bmyc
202	6.71e-24	0.497413	0.367	0.284	1.09e-19	2	Sh2d1a
203	1.53e-31	0.489518	0.509	0.403	2.49e-27	2	Pou2f2
204	1.91e-27	0.467996	0.417	0.329	3.11e-23	2	Agfg1
205	6.17e-39	0.462819	0.654	0.558	1e-34	2	Lbh
206	1.26e-34	0.46272	0.538	0.439	2.06e-30	2	Gimap7
207	3.59e-31	0.46139	0.401	0.295	5.84e-27	2	Tox
208	9.77e-29	0.461086	0.504	0.407	1.59e-24	2	Il2rb
209	8.55e-21	0.443473	0.343	0.264	1.39e-16	2	Ptpn22
210	4.5e-23	0.430464	0.491	0.421	7.32e-19	2	Smap1
211	1.43e-29	0.420875	0.598	0.529	2.32e-25	2	Rgs10
212	2.62e-15	0.417292	0.274	0.21	4.27e-11	2	Pmepa1
213	2.41e-16	0.415075	0.416	0.353	3.92e-12	2	Ypel3
214	5.2e-27	0.408419	0.661	0.598	8.47e-23	2	Zfp36l1
215	1.76e-21	0.403029	0.293	0.212	2.86e-17	2	Ephx1
216	2.68e-31	0.396074	0.373	0.259	4.36e-27	2	Maf
217	7.15e-17	0.394521	0.408	0.337	1.16e-12	2	Ipcef1
218	1.14e-35	0.393851	0.35	0.236	1.86e-31	2	Tbc1d4
219	7.65e-23	0.387044	0.442	0.353	1.25e-18	2	Ift80
220	2.89e-17	0.380438	0.251	0.182	4.71e-13	2	Ssbp2
221	3.26e-21	0.372512	0.315	0.232	5.31e-17	2	Igflr1
222	2.07e-22	0.369328	0.524	0.453	3.38e-18	2	Cd28
223	2.47e-16	0.363639	0.26	0.194	4.02e-12	2	Elk3
224	1.94e-13	0.362111	0.39	0.334	3.16e-09	2	Atpif1
225	3.34e-16	0.357716	0.358	0.289	5.43e-12	2	Itgal
226	2.18e-17	0.353838	0.449	0.387	3.55e-13	2	Ramp1
227	2.21e-11	0.352521	0.373	0.323	3.6e-07	2	St8sia4
228	5.91e-17	0.351625	0.406	0.337	9.62e-13	2	Hif1a
229	3.62e-17	0.346285	0.556	0.493	5.9e-13	2	AC149090.1
230	5.17e-14	0.339887	0.35	0.286	8.41e-10	2	Trp53inp1
231	1.73e-12	0.339727	0.274	0.217	2.82e-08	2	Ikzf4
232	1.59e-22	0.336294	0.634	0.575	2.58e-18	2	Arl6ip1
233	6.56e-14	0.336217	0.396	0.339	1.07e-09	2	Tnfaip8
234	2.42e-34	0.335944	0.902	0.884	3.94e-30	2	Ltb
235	5.16e-43	0.326508	0.912	0.882	8.4e-39	2	Shisa5
236	1.34e-32	0.320826	0.838	0.789	2.18e-28	2	Gimap3
237	1.58e-10	0.317772	0.293	0.242	2.57e-06	2	Cir1
238	1.2e-22	0.317639	0.674	0.613	1.96e-18	2	Smc4
239	9.22e-15	0.31427	0.426	0.356	1.5e-10	2	Rgs1
240	3.57e-09	0.305324	0.364	0.322	5.82e-05	2	Il16
241	7.32e-11	0.302685	0.338	0.288	1.19e-06	2	Sesn3
242	2.02e-13	0.297139	0.612	0.589	3.29e-09	2	2410006H16Rik
243	1.17e-06	0.29528	0.307	0.271	0.0190642	2	Id3
244	1.09e-38	0.294225	0.868	0.79	1.78e-34	2	Foxp3
245	1.92e-26	0.290836	0.802	0.736	3.12e-22	2	Clec2d
246	1.21e-16	0.286229	0.42	0.345	1.96e-12	2	Samsn1
247	5.01e-10	0.284543	0.308	0.259	8.15e-06	2	Cd96
248	3.51e-11	0.283705	0.501	0.459	5.72e-07	2	Ankrd12
249	1.97e-12	0.278006	0.619	0.594	3.2e-08	2	Cdk2ap2
250	4.45e-10	0.275729	0.398	0.353	7.24e-06	2	Nrip1
251	7.92e-11	0.27553	0.6	0.572	1.29e-06	2	Celf2
252	7.05e-09	0.272968	0.435	0.397	0.000114752	2	Rab8b
253	5.16e-07	0.271697	0.358	0.325	0.00840782	2	Sash3
254	3.96e-15	0.271171	0.534	0.476	6.44e-11	2	Tnfrsf18
255	7.45e-10	0.270664	0.349	0.299	1.21e-05	2	Gpr174
256	1.71e-10	0.269314	0.268	0.214	2.79e-06	2	Slamf1
257	4.64e-26	0.265933	0.832	0.822	7.56e-22	2	Pfdn5
258	7.82e-25	0.258448	0.799	0.767	1.27e-20	2	Ptprcap
259	4.62e-06	0.258328	0.318	0.284	0.0752116	2	Smpdl3a
260	4.35e-07	0.257925	0.397	0.366	0.00708576	2	Rassf5
261	3e-61	0.254401	0.999	0.999	4.88e-57	2	mt-Co1
262	6.75e-25	0.252021	0.894	0.893	1.1e-20	2	Mbnl1
263	4.54e-23	0.251584	0.849	0.817	7.39e-19	2	Cd3g
264	3.73e-246	1.75289	0.799	0.347	6.07e-242	3	Tnfrsf4
265	6.43e-270	1.53825	0.651	0.197	1.05e-265	3	Bcl2a1b
266	0	1.53049	0.539	0.107	0	3	Tnfrsf9
267	2.09e-133	1.22873	0.405	0.128	3.4e-129	3	Hivep3
268	3.7e-125	1.22636	0.753	0.429	6.02e-121	3	Nfkbia
269	1.21e-79	1.22088	0.261	0.083	1.97e-75	3	Egr1
270	6.36e-104	1.2043	0.87	0.701	1.04e-99	3	Srgn
271	1.15e-106	1.19829	0.542	0.25	1.87e-102	3	Rel
272	5.86e-160	1.18284	0.462	0.145	9.54e-156	3	Batf
273	1.43e-196	1.16153	0.478	0.131	2.32e-192	3	Rilpl2
274	1.06e-88	1.13911	0.258	0.075	1.73e-84	3	Nrn1
275	2.14e-97	1.12248	0.854	0.701	3.49e-93	3	Ncl
276	4.07e-95	1.08363	0.25	0.067	6.63e-91	3	Nr4a1
277	3.24e-178	1.07021	0.364	0.08	5.27e-174	3	Cd83
278	8.43e-78	1.05387	0.734	0.565	1.37e-73	3	Mif
279	3.72e-140	1.04779	0.905	0.749	6.05e-136	3	Hsp90ab1
280	3.29e-157	1.0424	0.475	0.152	5.36e-153	3	Odc1
281	3.76e-140	1.03953	0.344	0.089	6.12e-136	3	Gadd45b
282	3.49e-93	0.958135	0.506	0.226	5.68e-89	3	Cd81
283	2.53e-132	0.935192	0.382	0.112	4.12e-128	3	Cst7
284	1.26e-143	0.921253	0.33	0.081	2.05e-139	3	Bcl2a1d
285	3.52e-73	0.908828	0.5	0.267	5.73e-69	3	Hspd1
286	5.61e-76	0.907725	0.345	0.135	9.14e-72	3	Tagap
287	2.25e-90	0.892763	0.783	0.581	3.67e-86	3	Eif5a
288	8.19e-64	0.880496	0.511	0.275	1.33e-59	3	Bmyc
289	1.17e-97	0.879388	0.75	0.472	1.9e-93	3	Hspa5
290	2.29e-79	0.848778	0.755	0.528	3.73e-75	3	Psme2
291	1.43e-98	0.831389	0.379	0.132	2.34e-94	3	Cd200
292	2.54e-64	0.826268	0.543	0.299	4.14e-60	3	Jarid2
293	1.04e-66	0.82155	0.76	0.601	1.69e-62	3	Set
294	2.22e-74	0.813883	0.831	0.59	3.61e-70	3	Zfp36l1
295	4.76e-82	0.802602	0.442	0.193	7.75e-78	3	Orai1
296	1.82e-83	0.798763	0.632	0.334	2.97e-79	3	2310001H17Rik
297	5.77e-74	0.781521	0.676	0.44	9.39e-70	3	Ran
298	1.23e-67	0.760987	0.641	0.41	2.01e-63	3	Ddx21
299	1.8e-57	0.760114	0.633	0.433	2.93e-53	3	Nme1
300	1.23e-57	0.755763	0.712	0.534	2e-53	3	Hspe1
301	8.94e-72	0.75391	0.528	0.272	1.46e-67	3	B3gnt2
302	4.43e-59	0.748753	0.511	0.291	7.22e-55	3	Nop58
303	1.47e-31	0.747187	0.377	0.224	2.4e-27	3	Cd69
304	1.91e-55	0.742767	0.568	0.328	3.11e-51	3	Ctla4
305	1.23e-79	0.739403	0.431	0.185	2e-75	3	Fabp5
306	3.65e-42	0.735394	0.34	0.168	5.94e-38	3	Sapcd1
307	1.22e-74	0.735015	0.491	0.236	1.98e-70	3	Tbc1d4
308	1.14e-83	0.73223	0.428	0.185	1.85e-79	3	Nhp2
309	7.79e-68	0.72453	0.738	0.526	1.27e-63	3	Eif4a1
310	4.96e-53	0.710872	0.897	0.809	8.07e-49	3	Npm1
311	9.3e-58	0.707522	0.573	0.33	1.52e-53	3	Hif1a
312	4.6e-74	0.707459	0.514	0.246	7.49e-70	3	Tiam1
313	4.36e-66	0.704175	0.604	0.337	7.09e-62	3	Samsn1
314	1.41e-46	0.695138	0.458	0.257	2.29e-42	3	Dusp2
315	3.53e-100	0.695118	0.403	0.146	5.75e-96	3	Mrps6
316	6.21e-45	0.694054	0.496	0.292	1.01e-40	3	Prkca
317	4.93e-64	0.691359	0.339	0.141	8.03e-60	3	Eea1
318	1.54e-69	0.689077	0.754	0.553	2.51e-65	3	Snrpf
319	3.03e-52	0.688215	0.399	0.197	4.93e-48	3	Kdm6b
320	4.95e-107	0.686912	0.987	0.951	8.06e-103	3	Ptma
321	3.23e-76	0.680468	0.641	0.37	5.26e-72	3	St13
322	5.77e-49	0.673926	0.662	0.473	9.4e-45	3	Hsp90aa1
323	7.55e-63	0.670919	0.727	0.495	1.23e-58	3	2023-09-07
324	2.78e-84	0.667978	0.375	0.14	4.52e-80	3	Cd82
325	7.47e-77	0.658151	0.512	0.25	1.22e-72	3	Cct3
326	2.61e-55	0.650683	0.781	0.581	4.25e-51	3	Ndfip1
327	1.23e-55	0.647304	0.531	0.296	2.01e-51	3	Tox
328	3.89e-60	0.646405	0.573	0.341	6.34e-56	3	Ranbp1
329	9.87e-52	0.640628	0.437	0.24	1.61e-47	3	C1qbp
330	4.61e-54	0.635586	0.773	0.595	7.51e-50	3	Ybx1
331	6.23e-48	0.633967	0.791	0.658	1.01e-43	3	Hspa8
332	1.17e-44	0.632227	0.552	0.353	1.91e-40	3	Tuba1b
333	2.52e-54	0.630594	0.785	0.625	4.11e-50	3	Gapdh
334	3.44e-54	0.629135	0.56	0.326	5.6e-50	3	Agfg1
335	1.49e-55	0.625751	0.559	0.332	2.43e-51	3	Cycs
336	2.37e-49	0.623743	0.629	0.43	3.86e-45	3	Txn1
337	5.27e-57	0.619349	0.842	0.668	8.57e-53	3	H2afz
338	4.71e-58	0.604272	0.416	0.202	7.67e-54	3	Gnl3
339	1.11e-37	0.603938	0.694	0.496	1.8e-33	3	Junb
340	2.7e-51	0.603445	0.544	0.315	4.39e-47	3	Nfkb1
341	8.93e-52	0.599498	0.392	0.193	1.45e-47	3	Hdac7
342	8.13e-45	0.598728	0.493	0.29	1.32e-40	3	Gimap5
343	8.03e-42	0.597093	0.555	0.344	1.31e-37	3	Nrip1
344	1.95e-46	0.592925	0.4	0.215	3.17e-42	3	Pa2g4
345	2.26e-19	0.590312	0.394	0.264	3.67e-15	3	Gpr183
346	1.34e-38	0.580551	0.625	0.435	2.18e-34	3	Sdf4
347	6.54e-49	0.577968	0.706	0.513	1.06e-44	3	Atp5g1
348	6.35e-53	0.575999	0.711	0.466	1.03e-48	3	Tnfrsf18
349	1.48e-55	0.573174	0.857	0.711	2.4e-51	3	Psme1
350	1.66e-73	0.567086	0.302	0.108	2.71e-69	3	Ybx3
351	9.23e-50	0.564777	0.695	0.499	1.5e-45	3	Anp32b
352	7.47e-49	0.561723	0.972	0.936	1.22e-44	3	Cd52
353	2.84e-43	0.558908	0.605	0.386	4.63e-39	3	Rab8b
354	1.68e-41	0.558184	0.484	0.292	2.74e-37	3	Ppp1r14b
355	2.01e-50	0.553033	0.865	0.767	3.28e-46	3	Serbp1
356	2.51e-51	0.545462	0.747	0.552	4.09e-47	3	Psma7
357	1.77e-54	0.540859	0.317	0.136	2.88e-50	3	Nolc1
358	1.94e-44	0.540489	0.465	0.257	3.16e-40	3	Tank
359	1.05e-39	0.537814	0.52	0.317	1.7e-35	3	Irf2bp2
360	7.1e-37	0.533206	0.469	0.29	1.16e-32	3	Wdr43
361	7.39e-48	0.532375	0.57	0.351	1.2e-43	3	Pdap1
362	4.16e-76	0.530821	0.408	0.169	6.78e-72	3	Fam162a
363	2.73e-45	0.52226	0.385	0.194	4.45e-41	3	Nfatc1
364	5.16e-49	0.521734	0.352	0.167	8.4e-45	3	Mybbp1a
365	4.03e-79	0.520154	0.294	0.097	6.57e-75	3	Apex1
366	1.69e-23	0.517619	0.539	0.386	2.75e-19	3	Ramp1
367	2.5e-55	0.512442	0.921	0.759	4.07e-51	3	Ptprcap
368	3.14e-40	0.502157	0.507	0.312	5.11e-36	3	Snrpd1
369	5.53e-52	0.501949	0.363	0.172	9.01e-48	3	Pgam1
370	4.86e-49	0.500947	0.408	0.205	7.91e-45	3	Zap70
371	5.73e-40	0.500234	0.407	0.226	9.34e-36	3	Nop56
372	4.26e-42	0.498878	0.463	0.273	6.94e-38	3	Fbl
373	1.03e-40	0.494763	0.443	0.249	1.67e-36	3	Itm2c
374	3.92e-53	0.492158	0.301	0.127	6.38e-49	3	Ppa1
375	4.57e-48	0.491792	0.416	0.21	7.44e-44	3	Ephx1
376	4.42e-50	0.490504	0.737	0.529	7.19e-46	3	Prdx1
377	2.48e-47	0.490209	0.304	0.135	4.04e-43	3	Hnrnpll
378	5.45e-35	0.489979	0.665	0.508	8.87e-31	3	Slc25a5
379	2.79e-38	0.487734	0.638	0.432	4.54e-34	3	Calr
380	2.09e-66	0.486348	0.28	0.099	3.41e-62	3	Snhg15
381	3.02e-46	0.486277	0.564	0.344	4.91e-42	3	Pebp1
382	3.39e-43	0.485836	0.608	0.401	5.53e-39	3	Eif3c
383	2.33e-41	0.483621	0.717	0.537	3.8e-37	3	Uqcrq
384	3.9e-34	0.482049	0.25	0.117	6.36e-30	3	Myc
385	2e-34	0.480943	0.826	0.674	3.26e-30	3	Cyba
386	6.33e-48	0.472479	0.443	0.236	1.03e-43	3	Eif1ax
387	5.18e-54	0.472125	0.273	0.107	8.44e-50	3	A430093F15Rik
388	2.83e-39	0.46845	0.418	0.238	4.61e-35	3	Cct6a
389	1.31e-55	0.466734	0.267	0.102	2.14e-51	3	Relb
390	8.43e-38	0.466483	0.592	0.388	1.37e-33	3	Rap1a
391	1.72e-36	0.466313	0.68	0.51	2.81e-32	3	Snrpd2
392	9.06e-60	0.461603	0.294	0.112	1.48e-55	3	Tnfrsf1b
393	1.59e-36	0.461503	0.547	0.36	2.59e-32	3	Cct2
394	2.51e-33	0.459549	0.796	0.603	4.09e-29	3	Izumo1r
395	3.63e-47	0.459452	0.251	0.102	5.91e-43	3	Kdm2b
396	2.34e-39	0.458402	0.607	0.408	3.82e-35	3	Metap2
397	1.69e-41	0.45808	0.387	0.205	2.75e-37	3	Prmt1
398	6.52e-36	0.457993	0.386	0.212	1.06e-31	3	Pdia6
399	3.91e-47	0.457619	0.881	0.659	6.37e-43	3	Ikzf2
400	4.2e-34	0.456919	0.556	0.369	6.84e-30	3	Eif5b
401	1.81e-37	0.45497	0.519	0.324	2.95e-33	3	Ndufa12
402	2.03e-41	0.453401	0.263	0.115	3.31e-37	3	Casp3
403	1.65e-32	0.453112	0.632	0.455	2.68e-28	3	Nap1l1
404	1.05e-28	0.452245	0.458	0.291	1.71e-24	3	Traf1
405	4.67e-35	0.451856	0.52	0.325	7.6e-31	3	Rbis
406	6.35e-43	0.449959	0.773	0.589	1.03e-38	3	Sumo2
407	1.55e-34	0.449731	0.922	0.814	2.53e-30	3	Cd3g
408	5.52e-31	0.449123	0.436	0.269	8.99e-27	3	Mat2a
409	1.34e-28	0.44773	0.6	0.444	2.18e-24	3	Hnrnpab
410	3.26e-30	0.447117	0.485	0.31	5.31e-26	3	Ier5
411	7.43e-53	0.446405	0.938	0.854	1.21e-48	3	Atp5e
412	5.14e-39	0.446012	0.676	0.468	8.37e-35	3	Pomp
413	8.06e-38	0.444691	0.581	0.378	1.31e-33	3	Psma4
414	2.05e-41	0.444186	0.747	0.564	3.33e-37	3	Atp5md
415	6.85e-42	0.441919	0.433	0.237	1.12e-37	3	Tmem256
416	1.99e-35	0.440968	0.419	0.24	3.24e-31	3	Etfb
417	3.43e-36	0.440297	0.494	0.307	5.58e-32	3	Erh
418	7.58e-38	0.439987	0.27	0.125	1.23e-33	3	Swap70
419	1.68e-33	0.436422	0.604	0.408	2.74e-29	3	Bzw1
420	1.38e-35	0.436365	0.578	0.39	2.25e-31	3	Timm13
421	2.72e-18	0.4355	0.623	0.495	4.43e-14	3	Slfn2
422	1.18e-38	0.435093	0.411	0.229	1.91e-34	3	Rsl1d1
423	2.93e-32	0.433373	0.774	0.61	4.78e-28	3	Lcp1
424	2.79e-26	0.431527	0.549	0.395	4.54e-22	3	Rps27l
425	1.23e-18	0.430349	0.788	0.684	2.01e-14	3	Ccnd2
426	1.07e-31	0.428465	0.504	0.332	1.74e-27	3	Cct5
427	5.66e-41	0.424405	0.557	0.346	9.22e-37	3	Ndufb8
428	1.32e-39	0.423666	0.518	0.322	2.15e-35	3	Cct8
429	2.1e-41	0.420597	0.376	0.196	3.42e-37	3	Snrpa1
430	7.98e-25	0.42014	0.29	0.161	1.3e-20	3	Tnfaip3
431	7.58e-48	0.417058	0.267	0.109	1.23e-43	3	Larp1b
432	1.02e-32	0.416956	0.609	0.416	1.66e-28	3	Aldoa
433	1.93e-23	0.415312	0.641	0.504	3.14e-19	3	Ldha
434	6.39e-27	0.415273	0.764	0.606	1.04e-22	3	Ucp2
435	3.39e-38	0.413663	0.452	0.265	5.51e-34	3	Denr
436	1.15e-30	0.413294	0.533	0.35	1.88e-26	3	G3bp1
437	3.81e-46	0.412749	0.3	0.131	6.2e-42	3	Smco4
438	8.5e-36	0.412555	0.709	0.509	1.38e-31	3	Edf1
439	5.21e-30	0.412199	0.441	0.266	8.48e-26	3	Maf
440	5.92e-24	0.411628	0.585	0.413	9.64e-20	3	Lcp2
441	6.09e-26	0.411264	0.5	0.336	9.92e-22	3	Tnfaip8
442	1.21e-32	0.41086	0.953	0.916	1.97e-28	3	Rps2
443	4.2e-48	0.410553	0.328	0.148	6.83e-44	3	Dkc1
444	8.94e-42	0.409604	0.258	0.11	1.46e-37	3	Bcl2l15
445	1.27e-29	0.409496	0.436	0.274	2.07e-25	3	Cacybp
446	5.73e-33	0.407714	0.67	0.48	9.33e-29	3	Atp5g3
447	4.16e-35	0.406746	0.397	0.222	6.78e-31	3	Cops6
448	7.49e-40	0.406349	0.342	0.171	1.22e-35	3	Nifk
449	6.23e-40	0.405945	0.495	0.291	1.01e-35	3	Ndufb2
450	3.36e-39	0.405134	0.823	0.666	5.47e-35	3	Snrpe
451	3.77e-26	0.405008	0.597	0.436	6.14e-22	3	Srsf2
452	7.03e-60	0.404936	0.991	0.964	1.14e-55	3	Pfn1
453	4.95e-32	0.404897	0.434	0.261	8.07e-28	3	Phb2
454	3.01e-29	0.403794	0.465	0.287	4.91e-25	3	Itgal
455	3.54e-27	0.401914	0.5	0.337	5.76e-23	3	Banf1
456	1.06e-25	0.401711	0.288	0.158	1.72e-21	3	Timp2
457	9.42e-34	0.400382	0.815	0.687	1.53e-29	3	Chchd2
458	6.86e-29	0.39956	0.559	0.388	1.12e-24	3	Snu13
459	9.82e-30	0.399067	0.745	0.582	1.6e-25	3	Eif2s2
460	1.14e-29	0.394673	0.763	0.612	1.86e-25	3	Atp5k
461	3.9e-17	0.394114	0.259	0.157	6.35e-13	3	Nfkbiz
462	1.82e-19	0.393386	0.796	0.714	2.97e-15	3	Nme2
463	1.2e-31	0.392088	0.369	0.207	1.96e-27	3	Ptpn6
464	2.36e-36	0.39	0.444	0.256	3.84e-32	3	Atp1a1
465	6.29e-46	0.38777	0.265	0.11	1.02e-41	3	Mrto4
466	1.04e-29	0.387605	0.455	0.29	1.69e-25	3	Ndufab1
467	1.94e-33	0.387492	0.42	0.243	3.16e-29	3	Aebp2
468	5.94e-39	0.386885	0.396	0.214	9.68e-35	3	Psmc5
469	2.74e-33	0.386312	0.29	0.145	4.46e-29	3	Mdn1
470	1.38e-27	0.385435	0.654	0.484	2.25e-23	3	Atp5d
471	2.71e-33	0.383329	0.408	0.236	4.41e-29	3	Pgk1
472	2.46e-30	0.383309	0.635	0.463	4.01e-26	3	Cox5a
473	8.11e-32	0.381257	0.462	0.286	1.32e-27	3	Sms
474	4.72e-29	0.381043	0.506	0.325	7.68e-25	3	Arf6
475	2.19e-35	0.380859	0.414	0.235	3.56e-31	3	Tcp1
476	2.4e-40	0.380034	0.27	0.12	3.92e-36	3	Tomm40
477	9.65e-48	0.37921	0.324	0.145	1.57e-43	3	Rpl7l1
478	1.14e-34	0.378627	0.321	0.164	1.86e-30	3	Pdcd11
479	2.19e-41	0.378126	0.297	0.137	3.56e-37	3	Ddx27
480	2.63e-30	0.377987	0.775	0.615	4.28e-26	3	Mrpl52
481	2.13e-26	0.375211	0.282	0.152	3.46e-22	3	Bcor
482	6.73e-27	0.373066	0.642	0.48	1.1e-22	3	Micos10
483	1.05e-40	0.372499	0.91	0.799	1.71e-36	3	Cox6c
484	1.52e-29	0.368355	0.413	0.247	2.48e-25	3	Adss
485	8.39e-28	0.368035	0.725	0.577	1.37e-23	3	Hnrnpa1
486	4.41e-26	0.367734	0.341	0.196	7.19e-22	3	Cd44
487	4.41e-25	0.366633	0.722	0.593	7.18e-21	3	Cox7b
488	2.21e-35	0.36649	0.344	0.181	3.6e-31	3	Mrpl12
489	5.6e-30	0.366101	0.524	0.345	9.12e-26	3	Rwdd1
490	2.87e-27	0.364901	0.522	0.353	4.68e-23	3	Aprt
491	1.41e-28	0.363842	0.628	0.45	2.29e-24	3	Uqcrb
492	3.1e-25	0.36335	0.72	0.583	5.04e-21	3	Uqcr10
493	1.69e-19	0.363208	0.676	0.547	2.76e-15	3	Bola2
494	2.62e-24	0.362182	0.498	0.328	4.26e-20	3	Sh3bgrl
495	5.68e-29	0.360752	0.26	0.132	9.25e-25	3	Lyar
496	3.87e-34	0.360571	0.434	0.254	6.31e-30	3	Syncrip
497	5.62e-37	0.360523	0.293	0.141	9.15e-33	3	Eif3b
498	1.79e-19	0.359957	0.291	0.174	2.91e-15	3	Dusp1
499	8.55e-37	0.359357	0.329	0.164	1.39e-32	3	Larp7
500	7.46e-27	0.358043	0.748	0.61	1.22e-22	3	Atp5j
501	1.38e-35	0.357059	0.259	0.119	2.25e-31	3	Hacd3
502	5.6e-22	0.357024	0.55	0.399	9.12e-18	3	Smarca5
503	1.4e-24	0.354076	0.637	0.47	2.28e-20	3	Dad1
504	3.82e-21	0.352187	0.41	0.264	6.21e-17	3	Ier2
505	6.16e-34	0.351159	0.461	0.277	1e-29	3	Psma5
506	1.65e-30	0.350011	0.491	0.306	2.69e-26	3	Ndufv2
507	7.82e-30	0.349635	0.872	0.752	1.27e-25	3	Elob
508	2.17e-31	0.347995	0.318	0.17	3.53e-27	3	Ebna1bp2
509	7.16e-39	0.34785	0.328	0.162	1.17e-34	3	Mrpl17
510	2.03e-21	0.347476	0.661	0.539	3.3e-17	3	Eef1g
511	4.49e-26	0.347373	0.443	0.283	7.32e-22	3	Canx
512	3.48e-28	0.347	0.443	0.277	5.67e-24	3	Psma6
513	6.21e-28	0.346208	0.841	0.694	1.01e-23	3	Ubl5
514	2.82e-28	0.346098	0.863	0.752	4.59e-24	3	Cox8a
515	4.81e-23	0.345264	0.497	0.342	7.83e-19	3	Rbm8a
516	2.78e-30	0.344609	0.527	0.337	4.53e-26	3	Psmb6
517	3.31e-25	0.344421	0.706	0.546	5.39e-21	3	Srsf3
518	4.85e-31	0.344372	0.298	0.155	7.89e-27	3	Naa50
519	5.65e-26	0.343524	0.748	0.582	9.2e-22	3	Slc25a3
520	1.84e-24	0.343385	0.457	0.298	3e-20	3	Cebpz
521	2.32e-24	0.343325	0.487	0.323	3.77e-20	3	Sfpq
522	7.23e-23	0.343201	0.443	0.292	1.18e-18	3	Polr2f
523	6.8e-30	0.343089	0.376	0.219	1.11e-25	3	Gspt1
524	4.27e-25	0.343039	0.812	0.694	6.96e-21	3	Ndufa4
525	3.72e-25	0.342887	0.59	0.414	6.05e-21	3	Zc3h15
526	7.18e-20	0.342662	0.636	0.505	1.17e-15	3	Tubb5
527	6.01e-35	0.342415	0.293	0.143	9.79e-31	3	Mea1
528	9.77e-28	0.341209	0.467	0.292	1.59e-23	3	Arf4
529	3.52e-38	0.341044	0.327	0.161	5.74e-34	3	Hspa9
530	4.69e-27	0.340938	0.441	0.276	7.64e-23	3	Anp32e
531	3.94e-36	0.340876	0.267	0.124	6.41e-32	3	Gar1
532	3.08e-24	0.340679	0.506	0.35	5.02e-20	3	Pkm
533	7.43e-20	0.339973	0.271	0.158	1.21e-15	3	Ptger4
534	1.33e-26	0.337867	0.497	0.326	2.17e-22	3	Psmb2
535	8.34e-35	0.337644	0.274	0.13	1.36e-30	3	Utp18
536	1.69e-23	0.337413	0.305	0.174	2.75e-19	3	Il21r
537	1.9e-21	0.336332	0.582	0.408	3.09e-17	3	Pou2f2
538	2.74e-25	0.335194	0.344	0.202	4.46e-21	3	Cdv3
539	3.47e-27	0.334837	0.378	0.227	5.65e-23	3	Hspa4
540	2.96e-26	0.333588	0.398	0.241	4.82e-22	3	Uqcc2
541	1.79e-25	0.332931	0.342	0.198	2.92e-21	3	Sh2d2a
542	2.91e-11	0.331477	0.368	0.269	4.74e-07	3	Id3
543	3.86e-24	0.330741	0.384	0.239	6.28e-20	3	Timm23
544	3.8e-34	0.33049	0.29	0.142	6.19e-30	3	Phb
545	2.24e-25	0.330208	0.482	0.321	3.65e-21	3	Eloc
546	4.38e-05	0.330133	0.509	0.442	0.713145	3	Rnaset2a
547	4.3e-21	0.329644	0.614	0.459	7.01e-17	3	Ssb
548	3.16e-32	0.329442	0.336	0.18	5.14e-28	3	Txnl4a
549	1.97e-27	0.329335	0.398	0.236	3.2e-23	3	Arhgef3
550	2.46e-35	0.328995	0.33	0.169	4e-31	3	Ddx39
551	3.09e-24	0.328841	0.367	0.22	5.03e-20	3	Ndufs8
552	1.13e-21	0.32872	0.464	0.312	1.84e-17	3	M6pr
553	2.44e-24	0.328445	0.682	0.523	3.98e-20	3	Uqcr11
554	1.5e-24	0.327953	0.601	0.43	2.45e-20	3	Ssr4
555	8.69e-23	0.326802	0.389	0.249	1.42e-18	3	Nudc
556	1.28e-17	0.326643	0.784	0.643	2.08e-13	3	Cd2
557	5.87e-28	0.326322	0.889	0.798	9.55e-24	3	Cox7c
558	1.27e-22	0.326082	0.86	0.714	2.07e-18	3	Trac
559	7.98e-17	0.325929	0.402	0.278	1.3e-12	3	Hdgf
560	1.07e-26	0.32588	0.421	0.26	1.74e-22	3	Ctsb
561	3.38e-25	0.325621	0.44	0.276	5.5e-21	3	Cab39
562	5.12e-31	0.325037	0.394	0.226	8.34e-27	3	Psmd12
563	7.21e-25	0.324897	0.947	0.879	1.17e-20	3	Cd3e
564	2.02e-28	0.324891	0.544	0.358	3.29e-24	3	Ube2l3
565	3.79e-23	0.323808	0.59	0.427	6.18e-19	3	Top1
566	5.83e-32	0.322625	0.314	0.163	9.49e-28	3	Brix1
567	1.16e-31	0.320891	0.471	0.289	1.88e-27	3	Dcun1d5
568	4.41e-28	0.320401	0.294	0.159	7.18e-24	3	Impdh2
569	7.56e-30	0.319739	0.314	0.167	1.23e-25	3	Rcc2
570	3.1e-25	0.319331	0.456	0.288	5.05e-21	3	Psmd8
571	7.78e-29	0.319289	0.404	0.239	1.27e-24	3	Bola3
572	5.66e-17	0.318812	0.917	0.814	9.22e-13	3	Cd3d
573	1.69e-20	0.318771	0.441	0.306	2.76e-16	3	Tomm5
574	1.23e-38	0.318248	0.296	0.138	2.01e-34	3	Phgdh
575	5.65e-21	0.318035	0.454	0.311	9.2e-17	3	Pgls
576	1.22e-23	0.317237	0.523	0.36	1.99e-19	3	Ndufs6
577	8.16e-17	0.316335	0.467	0.334	1.33e-12	3	Atpif1
578	2.27e-25	0.313684	0.404	0.253	3.7e-21	3	Eif2s1
579	6.35e-20	0.313428	0.485	0.34	1.03e-15	3	Gm47283
580	2.28e-24	0.313382	0.383	0.234	3.71e-20	3	Cfdp1
581	4.39e-33	0.313226	0.327	0.17	7.14e-29	3	Rpn1
582	5.34e-31	0.3132	0.304	0.158	8.7e-27	3	Larp4
583	2.39e-24	0.312996	0.389	0.236	3.89e-20	3	Asnsd1
584	3.79e-23	0.312594	0.7	0.54	6.17e-19	3	Dnaja1
585	6.66e-28	0.312177	0.291	0.154	1.08e-23	3	Mif4gd
586	2.17e-20	0.311629	0.377	0.237	3.53e-16	3	Gata3
587	2.1e-34	0.310869	0.274	0.13	3.43e-30	3	Bcap29
588	1.04e-30	0.310611	0.394	0.224	1.69e-26	3	Ndufb6
589	1.93e-14	0.310119	0.386	0.269	3.15e-10	3	Ptpn22
590	5.19e-25	0.309761	0.339	0.197	8.45e-21	3	Eprs
591	7.19e-27	0.309417	0.333	0.187	1.17e-22	3	Ak2
592	1.34e-26	0.308977	0.599	0.422	2.18e-22	3	Ndufa5
593	7.5e-27	0.308907	0.314	0.173	1.22e-22	3	Abce1
594	2.95e-28	0.308313	0.397	0.232	4.81e-24	3	Mrpl54
595	4.57e-21	0.307632	0.309	0.183	7.44e-17	3	Eif1a
596	1.35e-21	0.307504	0.377	0.238	2.2e-17	3	Eif3j1
597	3.05e-26	0.306287	0.423	0.262	4.97e-22	3	Rbbp7
598	5.6e-19	0.306019	0.675	0.535	9.12e-15	3	Hnrnpu
599	5.11e-23	0.305499	0.396	0.243	8.32e-19	3	Sdhaf1
600	1.36e-26	0.304299	0.864	0.725	2.21e-22	3	Atp5j2
601	8.08e-29	0.303835	0.325	0.177	1.32e-24	3	Wdr61
602	7.1e-20	0.303759	0.352	0.219	1.16e-15	3	Spint2
603	7.57e-18	0.303075	0.441	0.305	1.23e-13	3	Plgrkt
604	2.91e-20	0.30231	0.624	0.458	4.73e-16	3	Polr1d
605	2.68e-20	0.3023	0.719	0.57	4.36e-16	3	Abracl
606	1.87e-28	0.302126	0.294	0.156	3.05e-24	3	Ppid
607	9.59e-19	0.301507	0.678	0.546	1.56e-14	3	Atp5b
608	1.2e-24	0.300305	0.375	0.226	1.96e-20	3	AI662270
609	5.08e-13	0.299305	0.297	0.202	8.28e-09	3	Vsir
610	1.85e-28	0.29885	0.318	0.174	3.02e-24	3	Etf1
611	2.81e-22	0.29847	0.677	0.522	4.57e-18	3	Nedd8
612	1.82e-38	0.297974	0.264	0.117	2.97e-34	3	Stip1
613	6.01e-14	0.296904	0.336	0.226	9.79e-10	3	Skil
614	4.45e-17	0.295999	0.533	0.393	7.25e-13	3	Eif3a
615	1.22e-29	0.295867	0.251	0.122	1.98e-25	3	Polr2h
616	5.95e-30	0.295776	0.37	0.206	9.69e-26	3	Srsf9
617	2.09e-24	0.295439	0.371	0.222	3.4e-20	3	Emc6
618	1.35e-21	0.294682	0.415	0.268	2.2e-17	3	Eif3g
619	7.73e-23	0.294539	0.473	0.319	1.26e-18	3	Cct4
620	8.9e-23	0.294369	0.294	0.168	1.45e-18	3	Sar1a
621	1.81e-31	0.293671	0.98	0.964	2.95e-27	3	Rps12
622	2.79e-20	0.292769	0.553	0.399	4.54e-16	3	Hnrnpdl
623	1.97e-30	0.292336	0.25	0.121	3.21e-26	3	Bcl7c
624	6.01e-21	0.292258	0.412	0.264	9.79e-17	3	Csnk2b
625	8.5e-40	0.292051	0.25	0.106	1.38e-35	3	Timm10
626	4.39e-31	0.291575	0.341	0.182	7.14e-27	3	Polr2l
627	2.61e-20	0.291003	0.347	0.215	4.25e-16	3	Eif4g1
628	5e-22	0.290133	0.479	0.324	8.14e-18	3	Ddx18
629	2.51e-18	0.289662	0.456	0.318	4.09e-14	3	Caprin1
630	9.97e-25	0.289444	0.391	0.238	1.62e-20	3	Higd1a
631	8.6e-25	0.289238	0.343	0.202	1.4e-20	3	Psmd7
632	7.54e-21	0.289055	0.605	0.45	1.23e-16	3	Taf10
633	6.55e-27	0.288414	0.374	0.217	1.07e-22	3	Psmd11
634	4.64e-23	0.288148	0.293	0.165	7.56e-19	3	Ccdc50
635	2.63e-13	0.287851	0.496	0.382	4.29e-09	3	Tgfb1
636	2.51e-20	0.286723	0.592	0.437	4.09e-16	3	Snrpb
637	1.7e-33	0.28647	0.265	0.125	2.76e-29	3	Ruvbl1
638	4.37e-25	0.286407	0.442	0.28	7.12e-21	3	Rnps1
639	1.04e-27	0.286291	0.392	0.227	1.69e-23	3	Esf1
640	1.92e-18	0.286072	0.477	0.337	3.12e-14	3	Pdcd5
641	2.14e-23	0.285625	0.463	0.302	3.49e-19	3	U2af1
642	9.92e-18	0.285516	0.595	0.442	1.62e-13	3	Chd4
643	3.91e-16	0.285089	0.657	0.515	6.37e-12	3	Dynll1
644	1.14e-20	0.283957	0.537	0.372	1.86e-16	3	Prkar1a
645	2.08e-27	0.283906	0.341	0.192	3.39e-23	3	Dph3
646	1.16e-19	0.283277	0.592	0.432	1.89e-15	3	Micos13
647	3.57e-11	0.283057	0.766	0.635	5.81e-07	3	Jund
648	1.52e-20	0.282314	0.407	0.265	2.47e-16	3	Nars
649	8.55e-17	0.282097	0.563	0.408	1.39e-12	3	Fyn
650	3.86e-21	0.281976	0.526	0.37	6.28e-17	3	Ndufa11
651	4.15e-27	0.281146	0.312	0.17	6.76e-23	3	Eif4e
652	4.04e-21	0.280842	0.586	0.418	6.58e-17	3	Fubp1
653	2.28e-18	0.280569	0.336	0.209	3.71e-14	3	Tmem243
654	5.07e-24	0.280491	0.842	0.713	8.26e-20	3	Sem1
655	1.67e-18	0.280132	0.602	0.459	2.73e-14	3	Hnrnpc
656	3.02e-22	0.278889	0.35	0.212	4.91e-18	3	Gtpbp4
657	1.14e-17	0.278719	0.843	0.742	1.86e-13	3	Rbm3
658	3.36e-17	0.278378	0.31	0.194	5.48e-13	3	Tmem154
659	1.32e-20	0.277464	0.438	0.289	2.15e-16	3	Bax
660	6.38e-21	0.277331	0.396	0.255	1.04e-16	3	Lsm7
661	1.53e-27	0.277117	0.39	0.23	2.5e-23	3	Mrpl21
662	1.04e-23	0.276893	0.294	0.166	1.69e-19	3	Zbtb1
663	3.84e-24	0.276185	0.264	0.142	6.26e-20	3	Mphosph10
664	4.68e-22	0.275163	0.41	0.259	7.62e-18	3	Wdr83os
665	1.27e-25	0.274532	0.291	0.159	2.06e-21	3	Nasp
666	1.85e-17	0.274378	0.6	0.455	3.01e-13	3	Atp5o
667	9.3e-24	0.274264	0.283	0.158	1.51e-19	3	Ssr2
668	3e-23	0.274152	0.293	0.165	4.89e-19	3	Bccip
669	1.47e-18	0.273382	0.776	0.64	2.39e-14	3	Hnrnpk
670	6.52e-24	0.272083	0.354	0.21	1.06e-19	3	Vps29
671	2.59e-18	0.271433	0.53	0.374	4.22e-14	3	Arpc4
672	7.59e-29	0.271137	0.989	0.97	1.24e-24	3	Ppia
673	4.65e-21	0.271077	0.506	0.344	7.57e-17	3	Spcs1
674	6.24e-27	0.270896	0.286	0.151	1.02e-22	3	Lsm2
675	2.31e-23	0.270783	0.347	0.206	3.76e-19	3	Phf5a
676	1.02e-19	0.270395	0.568	0.409	1.66e-15	3	Pcbp1
677	9.79e-23	0.270312	0.25	0.134	1.59e-18	3	1110038B12Rik
678	1.51e-23	0.270034	0.355	0.211	2.46e-19	3	Naa10
679	4.7e-19	0.269829	0.652	0.514	7.66e-15	3	Psma3
680	1.73e-25	0.268458	0.388	0.231	2.81e-21	3	Mpc1
681	1.28e-18	0.26821	0.366	0.235	2.09e-14	3	Mrpl20
682	2.95e-17	0.266741	0.635	0.495	4.8e-13	3	Atp5a1
683	3.55e-16	0.266724	0.254	0.153	5.79e-12	3	Wls
684	3.38e-09	0.266128	0.911	0.84	5.51e-05	3	Ifi27l2a
685	8.5e-19	0.265572	0.461	0.321	1.38e-14	3	Cct7
686	6.96e-14	0.265148	0.489	0.363	1.13e-09	3	Kras
687	6.25e-22	0.265068	0.685	0.519	1.02e-17	3	Ndufb7
688	7.34e-19	0.264855	0.848	0.734	1.2e-14	3	Atp5g2
689	3.06e-19	0.264832	0.669	0.507	4.98e-15	3	Ndufa1
690	4.57e-29	0.264826	0.352	0.194	7.44e-25	3	Mrps36
691	4.61e-21	0.264472	0.285	0.164	7.5e-17	3	Clns1a
692	4.47e-10	0.263434	0.74	0.621	7.29e-06	3	Stk17b
693	6.42e-14	0.26246	0.59	0.454	1.05e-09	3	Hnrnpa0
694	3.19e-17	0.262309	0.703	0.548	5.2e-13	3	Myl12a
695	3.35e-22	0.262007	0.278	0.156	5.46e-18	3	Tcerg1
696	2.87e-16	0.261726	0.813	0.701	4.68e-12	3	Gas5
697	6.02e-25	0.26014	0.349	0.2	9.8e-21	3	Psmd14
698	3.63e-16	0.26014	0.437	0.305	5.92e-12	3	Ppp1r11
699	6.43e-20	0.260028	0.39	0.251	1.05e-15	3	Lsm12
700	3.37e-24	0.259437	0.33	0.189	5.48e-20	3	Mrpl15
701	5.87e-20	0.259282	0.514	0.358	9.55e-16	3	Ndufc2
702	7.96e-26	0.259267	0.396	0.237	1.3e-21	3	Txnl1
703	4.23e-23	0.259156	0.309	0.177	6.88e-19	3	Timm17a
704	1.07e-17	0.258927	0.278	0.167	1.74e-13	3	Nol12
705	2.43e-24	0.25884	0.331	0.192	3.95e-20	3	Psmb7
706	3.85e-13	0.258405	0.443	0.321	6.27e-09	3	Grap
707	3.01e-15	0.257898	0.695	0.554	4.91e-11	3	Ppib
708	1.47e-15	0.257733	0.493	0.352	2.4e-11	3	Vasp
709	3.97e-17	0.257612	0.825	0.708	6.46e-13	3	Hnrnpa2b1
710	4.09e-30	0.257589	0.277	0.14	6.67e-26	3	Pin1
711	8.71e-16	0.257509	0.29	0.181	1.42e-11	3	Bms1
712	1.02e-17	0.257444	0.316	0.196	1.67e-13	3	Elk3
713	6.02e-18	0.257037	0.714	0.573	9.81e-14	3	Cox5b
714	2.32e-27	0.256868	0.293	0.155	3.78e-23	3	Mbd3
715	6.01e-16	0.256464	0.332	0.216	9.79e-12	3	Dut
716	1.74e-17	0.255954	0.623	0.475	2.83e-13	3	Ndufb9
717	2.11e-17	0.255666	0.459	0.317	3.44e-13	3	Bcl10
718	2.47e-19	0.254855	0.371	0.236	4.03e-15	3	Pcna
719	1.03e-13	0.254663	0.899	0.822	1.68e-09	3	Actg1
720	2.05e-20	0.25439	0.383	0.242	3.34e-16	3	Dnajc2
721	1.53e-17	0.254376	0.492	0.348	2.49e-13	3	Pfdn2
722	7.71e-17	0.254325	0.834	0.746	1.26e-12	3	Btf3
723	1.67e-19	0.254103	0.392	0.254	2.72e-15	3	Supt16
724	7.77e-19	0.253289	0.359	0.23	1.27e-14	3	Eif4e2
725	3.61e-22	0.253283	0.347	0.208	5.87e-18	3	Slc38a1
726	5.57e-19	0.252885	0.282	0.167	9.06e-15	3	Reep3
727	4.97e-25	0.252502	0.291	0.158	8.1e-21	3	Crnkl1
728	6.63e-15	0.252295	0.52	0.395	1.08e-10	3	Ywhae
729	1.62e-14	0.251905	0.331	0.219	2.63e-10	3	Ppp4r2
730	1e-21	0.251806	0.272	0.153	1.64e-17	3	Znhit1
731	6.56e-29	0.251388	0.282	0.144	1.07e-24	3	Guk1
732	4.51e-12	0.251348	0.436	0.327	7.35e-08	3	Hmgn1
733	1.63e-21	0.250982	0.327	0.194	2.66e-17	3	Chd1
734	3.11e-19	0.250874	0.607	0.455	5.06e-15	3	Psmb3
735	1.94e-15	0.250452	0.519	0.386	3.16e-11	3	Hnrnpd
736	4.4e-18	0.250114	0.53	0.38	7.17e-14	3	Psmb4
737	7.23e-23	0.250059	0.284	0.158	1.18e-18	3	Timm17b
738	0	3.26174	0.726	0.108	0	4	S100a4
739	0	2.99216	0.739	0.165	0	4	S100a6
740	6.77e-177	2.15769	0.733	0.316	1.1e-172	4	Lgals1
741	3.73e-199	1.81764	0.954	0.736	6.08e-195	4	S100a10
742	4.72e-136	1.74196	0.811	0.446	7.69e-132	4	Crip1
743	1.74e-217	1.68208	0.876	0.382	2.83e-213	4	S100a11
744	6.29e-105	1.52305	0.642	0.302	1.02e-100	4	Itgb1
745	1.54e-135	1.34502	0.686	0.257	2.5e-131	4	Maf
746	9.56e-80	1.21784	0.724	0.451	1.56e-75	4	Vim
747	2.16e-78	1.20843	0.791	0.532	3.52e-74	4	Hmgb2
748	5.46e-131	1.19646	0.404	0.102	8.89e-127	4	Il18r1
749	7.56e-103	1.19225	0.799	0.424	1.23e-98	4	Ahnak
750	1.75e-59	1.14156	0.927	0.841	2.86e-55	4	Ifi27l2a
751	1.6e-144	1.08897	0.343	0.068	2.6e-140	4	Anxa2
752	6.95e-125	1.0293	0.405	0.104	1.13e-120	4	Rora
753	3.09e-90	1.00038	0.605	0.281	5.03e-86	4	Prr13
754	1.63e-54	0.941063	0.534	0.293	2.65e-50	4	Pycard
755	6.35e-72	0.895779	0.678	0.399	1.03e-67	4	S100a13
756	5.26e-28	0.872356	0.586	0.408	8.56e-24	4	Il7r
757	1.33e-91	0.853048	0.279	0.066	2.17e-87	4	Gm15987
758	5.87e-73	0.836767	0.408	0.149	9.55e-69	4	Icos
759	8.34e-56	0.835035	0.683	0.449	1.36e-51	4	Gmfg
760	4.13e-57	0.81134	0.626	0.362	6.73e-53	4	Tagln2
761	7.76e-64	0.807518	0.744	0.497	1.26e-59	4	Tspo
762	1.72e-64	0.772528	0.784	0.518	2.81e-60	4	Emp3
763	2.48e-50	0.766284	0.9	0.824	4.04e-46	4	Actg1
764	1.18e-49	0.754413	0.537	0.286	1.92e-45	4	Sh2d1a
765	8.65e-59	0.74479	0.653	0.366	1.41e-54	4	Capg
766	6.78e-65	0.736743	0.854	0.629	1.1e-60	4	Lsp1
767	2.57e-45	0.699046	0.735	0.526	4.18e-41	4	Arpc1b
768	3.77e-37	0.681139	0.62	0.382	6.14e-33	4	Atp2b1
769	3.43e-36	0.672404	0.468	0.255	5.58e-32	4	Emb
770	4.08e-31	0.670637	0.769	0.63	6.64e-27	4	Gapdh
771	1.07e-32	0.666227	0.56	0.349	1.73e-28	4	Serinc3
772	5.19e-42	0.666001	0.468	0.243	8.45e-38	4	Hist1h1e
773	6.86e-59	0.664965	0.377	0.145	1.12e-54	4	S1pr4
774	3.09e-32	0.662423	0.882	0.796	5.02e-28	4	Itm2b
775	1.7e-51	0.639204	0.323	0.121	2.78e-47	4	Cldnd1
776	3.05e-44	0.63749	0.517	0.284	4.96e-40	4	Ass1
777	7.23e-52	0.6351	0.402	0.171	1.18e-47	4	Cmtm7
778	2.69e-37	0.627565	0.621	0.397	4.38e-33	4	Gpx1
779	3.29e-64	0.619346	0.915	0.703	5.37e-60	4	Srgn
780	1.45e-32	0.610045	0.387	0.202	2.35e-28	4	Slc4a7
781	2.15e-39	0.587177	0.595	0.356	3.5e-35	4	Vamp8
782	6.64e-35	0.571506	0.566	0.356	1.08e-30	4	Reep5
783	5.29e-36	0.568574	0.484	0.262	8.61e-32	4	Slamf6
784	3.03e-44	0.566486	0.844	0.66	4.94e-40	4	Cdc42
785	1.65e-32	0.562822	0.715	0.487	2.69e-28	4	Pim1
786	5.16e-30	0.552404	0.708	0.487	8.4e-26	4	Dock2
787	2.51e-42	0.550944	0.89	0.768	4.08e-38	4	Calm1
788	7.5e-31	0.545444	0.545	0.33	1.22e-26	4	Sh3bgrl
789	1.19e-29	0.533093	0.577	0.364	1.94e-25	4	Fam107b
790	1.41e-36	0.532687	0.27	0.109	2.29e-32	4	Rfk
791	3.01e-44	0.532272	0.899	0.76	4.9e-40	4	Fxyd5
792	4.18e-40	0.531739	0.8	0.636	6.8e-36	4	Clic1
793	3.39e-29	0.527515	0.55	0.346	5.53e-25	4	Cd48
794	1.4e-38	0.526554	0.469	0.244	2.29e-34	4	Dok2
795	1.81e-30	0.520178	0.416	0.228	2.95e-26	4	AI662270
796	1.42e-44	0.512787	0.286	0.108	2.31e-40	4	Glrx
797	4.37e-48	0.510631	0.927	0.832	7.11e-44	4	Arhgdib
798	1.84e-37	0.507246	0.914	0.818	3e-33	4	Cd3g
799	1.3e-26	0.503557	0.759	0.631	2.12e-22	4	Hint1
800	9.94e-30	0.501596	0.636	0.412	1.62e-25	4	Flna
801	1.44e-35	0.4991	0.319	0.141	2.35e-31	4	Pglyrp1
802	1.64e-34	0.492862	0.292	0.126	2.67e-30	4	Fam129a
803	2.38e-25	0.481887	0.37	0.205	3.87e-21	4	Selenoh
804	4.39e-35	0.479388	0.836	0.663	7.15e-31	4	Myl12b
805	3e-28	0.477983	0.598	0.397	4.89e-24	4	Sec11c
806	1.29e-30	0.473803	0.581	0.375	2.1e-26	4	Arpc4
807	2.03e-26	0.469809	0.453	0.265	3.31e-22	4	Pkp3
808	1.57e-38	0.468021	0.316	0.135	2.56e-34	4	Smco4
809	3.57e-22	0.466262	0.443	0.265	5.82e-18	4	Gpr183
810	4.58e-27	0.462653	0.319	0.161	7.46e-23	4	Timp2
811	1.77e-25	0.459248	0.35	0.186	2.88e-21	4	Cited2
812	1.28e-22	0.458153	0.714	0.575	2.09e-18	4	Abracl
813	2.13e-31	0.457977	0.338	0.165	3.48e-27	4	Snx2
814	1.71e-18	0.456097	0.471	0.308	2.78e-14	4	Spn
815	8e-26	0.453364	0.69	0.51	1.3e-21	4	Arpc5
816	5.68e-19	0.452072	0.595	0.437	9.25e-15	4	Txn1
817	2.31e-24	0.44765	0.672	0.486	3.77e-20	4	Xrn2
818	1.34e-30	0.441426	0.866	0.755	2.18e-26	4	Cox8a
819	1e-77	0.440984	0.999	0.998	1.63e-73	4	Tmsb4x
820	2e-18	0.439852	0.727	0.55	3.26e-14	4	Tpr
821	1.9e-27	0.43658	0.386	0.208	3.1e-23	4	Tkt
822	8.68e-17	0.434185	0.322	0.192	1.41e-12	4	Selenop
823	2.13e-26	0.432941	0.727	0.558	3.47e-22	4	Arpc3
824	6.23e-21	0.429909	0.715	0.577	1.01e-16	4	Cox5b
825	2.42e-29	0.429386	0.443	0.248	3.95e-25	4	Lamtor5
826	1.55e-31	0.426281	0.924	0.861	2.53e-27	4	Myl6
827	2.44e-22	0.425508	0.319	0.172	3.97e-18	4	Ubl3
828	1.55e-26	0.425349	0.326	0.162	2.52e-22	4	Camk4
829	2.13e-10	0.424461	0.55	0.443	3.47e-06	4	Itga4
830	9.06e-25	0.419909	0.844	0.734	1.47e-20	4	Sh3bgrl3
831	3.84e-24	0.418131	0.611	0.408	6.25e-20	4	Itgb7
832	1.43e-31	0.418076	0.948	0.888	2.33e-27	4	Coro1a
833	8.6e-23	0.416766	0.781	0.624	1.4e-18	4	Sub1
834	5.14e-22	0.410388	0.411	0.246	8.37e-18	4	Ostf1
835	2.92e-25	0.410092	0.902	0.76	4.75e-21	4	AW112010
836	9.96e-20	0.407855	0.393	0.242	1.62e-15	4	Pgk1
837	7.07e-18	0.407004	0.535	0.38	1.15e-13	4	H2afv
838	2.37e-22	0.406994	0.575	0.394	3.86e-18	4	Gnb2
839	4.94e-19	0.406519	0.668	0.532	8.04e-15	4	Ppp1ca
840	2.72e-30	0.404234	0.878	0.768	4.43e-26	4	Arpc2
841	4.88e-21	0.402642	0.666	0.461	7.95e-17	4	Selplg
842	2.81e-29	0.402237	0.335	0.162	4.57e-25	4	Arl5c
843	6.27e-24	0.39978	0.797	0.613	1.02e-19	4	Lcp1
844	1.4e-19	0.399565	0.572	0.386	2.29e-15	4	Iqgap1
845	2.06e-17	0.39911	0.261	0.14	3.36e-13	4	Lipa
846	1.73e-19	0.397297	0.629	0.477	2.82e-15	4	Pomp
847	1.51e-22	0.397192	0.852	0.777	2.46e-18	4	Cox4i1
848	4.66e-25	0.393224	0.407	0.227	7.58e-21	4	Sla
849	3.61e-19	0.39289	0.668	0.507	5.88e-15	4	Ldha
850	4.67e-23	0.392421	0.858	0.789	7.6e-19	4	Oaz1
851	3.13e-21	0.391866	0.639	0.463	5.09e-17	4	Map1lc3b
852	5.08e-22	0.391442	0.583	0.384	8.27e-18	4	Thy1
853	3.98e-32	0.390098	0.946	0.866	6.48e-28	4	Serf2
854	8.29e-20	0.382737	0.86	0.718	1.35e-15	4	Trac
855	2.17e-18	0.382713	0.686	0.538	3.53e-14	4	Prdx1
856	2.11e-21	0.382577	0.3	0.158	3.43e-17	4	Mif4gd
857	9.57e-20	0.379644	0.58	0.398	1.56e-15	4	Fkbp1a
858	2.24e-20	0.378954	0.766	0.604	3.64e-16	4	Tsc22d4
859	1.64e-16	0.37754	0.416	0.268	2.67e-12	4	Ifngr1
860	1.9e-15	0.37601	0.367	0.231	3.09e-11	4	Fli1
861	4.53e-22	0.374764	0.799	0.65	7.38e-18	4	Gnai2
862	8e-27	0.374229	0.365	0.192	1.3e-22	4	1110008P14Rik
863	6.03e-21	0.372672	0.718	0.557	9.83e-17	4	Ppib
864	4.37e-22	0.36994	0.408	0.239	7.11e-18	4	Ap2s1
865	3.89e-25	0.368894	0.34	0.178	6.34e-21	4	Gstp3
866	3.14e-19	0.368826	0.258	0.134	5.11e-15	4	AU020206
867	1.47e-14	0.367585	0.694	0.563	2.39e-10	4	Tpm3
868	4.37e-21	0.363641	0.401	0.234	7.12e-17	4	Hist1h1c
869	2.4e-14	0.361798	0.572	0.429	3.9e-10	4	Dnajc8
870	1.95e-20	0.359448	0.647	0.487	3.17e-16	4	Mrpl33
871	1.73e-20	0.359428	0.838	0.745	2.81e-16	4	Rbm3
872	5.21e-19	0.356646	0.389	0.238	8.48e-15	4	Mrpl54
873	5.28e-23	0.354319	0.402	0.232	8.59e-19	4	Eif4e2
874	2.88e-15	0.353627	0.322	0.196	4.69e-11	4	Pik3c2a
875	2.76e-22	0.352956	0.483	0.299	4.5e-18	4	Tmem160
876	2.19e-14	0.352089	0.347	0.222	3.57e-10	4	Malt1
877	1.81e-27	0.351914	0.343	0.169	2.95e-23	4	Psen2
878	7.24e-16	0.351913	0.519	0.366	1.18e-11	4	Ppdpf
879	8.18e-18	0.350982	0.595	0.425	1.33e-13	4	Smap1
880	1.29e-17	0.350746	0.615	0.431	2.1e-13	4	Selenok
881	1.13e-16	0.350428	0.748	0.631	1.85e-12	4	Sec61b
882	8.61e-19	0.349689	0.297	0.164	1.4e-14	4	Ebp
883	1.28e-20	0.34718	0.279	0.143	2.09e-16	4	Dhrs7
884	2.82e-18	0.346696	0.514	0.343	4.59e-14	4	Mrps16
885	1.19e-16	0.344534	0.447	0.287	1.93e-12	4	Klhl6
886	5.63e-18	0.344245	0.294	0.16	9.17e-14	4	Nrp1
887	1.41e-23	0.344031	0.903	0.838	2.3e-19	4	Cfl1
888	1.36e-17	0.342539	0.642	0.483	2.21e-13	4	Pdia3
889	2.64e-20	0.341826	0.523	0.34	4.3e-16	4	Tnfaip8
890	9.38e-23	0.341419	0.459	0.274	1.53e-18	4	Plaat3
891	2.76e-16	0.341347	0.615	0.47	4.5e-12	4	Cox5a
892	2.57e-15	0.339454	0.727	0.619	4.18e-11	4	Scand1
893	8.39e-21	0.33913	0.294	0.154	1.37e-16	4	Ifi209
894	1.1e-17	0.338702	0.25	0.133	1.8e-13	4	Tesc
895	1.96e-16	0.338107	0.666	0.515	3.19e-12	4	Sri
896	2.2e-20	0.33799	0.593	0.417	3.59e-16	4	Atox1
897	1.66e-21	0.33771	0.353	0.197	2.7e-17	4	Rasgrp2
898	1.89e-18	0.33611	0.387	0.233	3.08e-14	4	Glud1
899	1.54e-18	0.33573	0.405	0.247	2.51e-14	4	Rbl2
900	1.69e-16	0.335662	0.483	0.323	2.75e-12	4	Anxa6
901	2.65e-13	0.335416	0.359	0.236	4.32e-09	4	Retreg1
902	3.45e-12	0.334535	0.499	0.367	5.62e-08	4	Arpc5l
903	3.29e-18	0.333944	0.62	0.459	5.36e-14	4	Ndufv3
904	3.73e-14	0.333317	0.73	0.578	6.08e-10	4	Atp1b3
905	5.08e-19	0.33319	0.745	0.597	8.28e-15	4	2023-09-01
906	1.17e-16	0.332099	0.51	0.352	1.9e-12	4	Nt5c
907	1.51e-14	0.331155	0.624	0.494	2.46e-10	4	Atp5f1
908	4.12e-17	0.330965	0.642	0.47	6.7e-13	4	Fis1
909	1.86e-14	0.33015	0.511	0.368	3.03e-10	4	Cwc15
910	6.7e-12	0.330147	0.647	0.504	1.09e-07	4	Junb
911	4.44e-19	0.329186	0.487	0.322	7.24e-15	4	Prelid1
912	3e-17	0.328855	0.802	0.692	4.89e-13	4	Chchd2
913	2.84e-12	0.324952	0.267	0.161	4.62e-08	4	Arl5a
914	1.65e-16	0.324244	0.615	0.463	2.68e-12	4	Polr1d
915	6.8e-16	0.322116	0.654	0.502	1.11e-11	4	Cyb5a
916	1.92e-18	0.320251	0.341	0.197	3.12e-14	4	Epsti1
917	7.21e-16	0.318799	0.565	0.398	1.17e-11	4	Rps27l
918	1.35e-13	0.318553	0.711	0.599	2.2e-09	4	Eif3h
919	1.05e-14	0.31677	0.48	0.33	1.71e-10	4	Stk24
920	1.34e-10	0.315971	0.635	0.492	2.18e-06	4	Crlf3
921	8.76e-18	0.315797	0.574	0.395	1.43e-13	4	Rap1a
922	4.75e-15	0.314808	0.63	0.49	7.74e-11	4	Atp5d
923	2.76e-15	0.312813	0.31	0.186	4.5e-11	4	Ncf4
924	6.04e-17	0.312629	0.77	0.659	9.84e-13	4	Cox6b1
925	2.61e-14	0.312596	0.651	0.491	4.25e-10	4	Tln1
926	2.25e-18	0.312497	0.925	0.895	3.67e-14	4	Naca
927	4.51e-14	0.311007	0.727	0.586	7.35e-10	4	Mndal
928	2.47e-14	0.309437	0.662	0.533	4.03e-10	4	Psmb1
929	2.52e-15	0.309226	0.678	0.533	4.11e-11	4	Cox17
930	1.92e-14	0.308529	0.736	0.613	3.13e-10	4	Anp32a
931	1.1e-16	0.308451	0.742	0.563	1.78e-12	4	Klf2
932	2.26e-06	0.30835	0.753	0.678	0.0368356	4	H2afz
933	5.61e-16	0.307667	0.465	0.31	9.13e-12	4	Grb2
934	1.18e-11	0.307461	0.422	0.305	1.92e-07	4	Dbi
935	1.91e-13	0.30704	0.523	0.382	3.11e-09	4	Tmem234
936	7.64e-14	0.307017	0.587	0.443	1.24e-09	4	Smdt1
937	2.35e-18	0.306498	0.513	0.335	3.83e-14	4	Atpif1
938	9.35e-19	0.305865	0.469	0.304	1.52e-14	4	Esd
939	4.86e-17	0.304226	0.367	0.22	7.92e-13	4	Capns1
940	1.45e-13	0.30403	0.386	0.251	2.35e-09	4	Aebp2
941	1.31e-13	0.303404	0.538	0.378	2.13e-09	4	Clint1
942	1.93e-10	0.303054	0.294	0.191	3.14e-06	4	Uhrf2
943	1.41e-14	0.300855	0.495	0.346	2.29e-10	4	Sars
944	4.67e-19	0.300175	0.414	0.252	7.61e-15	4	Mbd2
945	3.58e-13	0.299708	0.598	0.439	5.84e-09	4	Ripor2
946	3.31e-16	0.296274	0.444	0.294	5.4e-12	4	Psmd8
947	1.01e-12	0.295326	0.674	0.539	1.65e-08	4	Krtcap2
948	3.56e-12	0.293697	0.538	0.403	5.79e-08	4	Sfr1
949	2.31e-13	0.293184	0.367	0.238	3.77e-09	4	Ptpn7
950	1.3e-12	0.292996	0.593	0.442	2.12e-08	4	Cd37
951	6.32e-15	0.292823	0.455	0.301	1.03e-10	4	Lbr
952	5.27e-13	0.292772	0.395	0.266	8.58e-09	4	Calm3
953	4.54e-12	0.292612	0.806	0.732	7.4e-08	4	Atp5j2
954	2.33e-14	0.29241	0.538	0.383	3.79e-10	4	Cap1
955	8.2e-17	0.290686	0.961	0.93	1.33e-12	4	Ubb
956	7.12e-18	0.290424	0.519	0.34	1.16e-13	4	Hif1a
957	7.43e-16	0.288951	0.51	0.346	1.21e-11	4	Cdc42se1
958	2.13e-11	0.287934	0.65	0.527	3.48e-07	4	Lat
959	4.58e-19	0.287617	0.334	0.19	7.46e-15	4	Ufc1
960	3.88e-15	0.28751	0.821	0.748	6.32e-11	4	Atp5l
961	9.99e-18	0.28711	0.461	0.297	1.63e-13	4	Lamtor4
962	0.000531473	0.286517	0.277	0.222	1	4	Sesn1
963	2.97e-13	0.285387	0.571	0.434	4.84e-09	4	Cox6a1
964	1.02e-08	0.284087	0.329	0.229	0.000166727	4	Ly6e
965	1.06e-16	0.282027	0.458	0.292	1.72e-12	4	Tmem71
966	3.78e-15	0.280268	0.387	0.246	6.15e-11	4	Mkrn1
967	8.34e-13	0.280113	0.759	0.633	1.36e-08	4	Ndufb1-ps
968	5.48e-14	0.279844	0.96	0.916	8.93e-10	4	Trbc2
969	1.04e-16	0.279263	0.653	0.484	1.69e-12	4	Sf3b6
970	8.17e-16	0.278713	0.745	0.618	1.33e-11	4	Atp5k
971	5.99e-13	0.277508	0.407	0.272	9.76e-09	4	Bag1
972	4.57e-12	0.275851	0.386	0.262	7.44e-08	4	Mrpl18
973	3.47e-13	0.275122	0.258	0.151	5.65e-09	4	Syt11
974	1.09e-13	0.274898	0.557	0.399	1.78e-09	4	Dek
975	2.3e-10	0.272225	0.498	0.367	3.75e-06	4	Itpkb
976	5.9e-12	0.271857	0.502	0.369	9.61e-08	4	Ccdc12
977	4.89e-14	0.271769	0.765	0.619	7.96e-10	4	Skap1
978	9.84e-14	0.271501	0.325	0.2	1.6e-09	4	Cyth4
979	2.22e-19	0.270788	0.343	0.192	3.61e-15	4	Gm2a
980	1.42e-12	0.270627	0.666	0.527	2.31e-08	4	Nedd8
981	9.24e-13	0.270491	0.295	0.179	1.5e-08	4	Trat1
982	1.35e-16	0.270227	0.34	0.2	2.2e-12	4	Vmp1
983	2.22e-24	0.270142	0.286	0.137	3.62e-20	4	Glipr2
984	1.96e-12	0.269636	0.574	0.432	3.2e-08	4	Capza2
985	2.09e-15	0.269141	0.888	0.801	3.4e-11	4	Cox7c
986	2.79e-13	0.268824	0.472	0.332	4.54e-09	4	Psmb2
987	5.84e-20	0.268441	0.256	0.129	9.52e-16	4	Nudcd2
988	6.07e-10	0.26806	0.638	0.52	9.88e-06	4	Dynll1
989	1.76e-13	0.267727	0.428	0.288	2.87e-09	4	Slc25a4
990	2.69e-17	0.267473	0.362	0.214	4.38e-13	4	Bloc1s1
991	1.04e-14	0.26632	0.382	0.246	1.69e-10	4	Tmem256
992	1.77e-11	0.264524	0.311	0.2	2.88e-07	4	Pts
993	1.71e-10	0.263981	0.784	0.699	2.79e-06	4	Ndufa4
994	2.46e-14	0.263578	0.864	0.805	4.01e-10	4	Cox6c
995	4.52e-14	0.263262	0.657	0.513	7.37e-10	4	Ndufa1
996	7.67e-08	0.262564	0.311	0.22	0.00124955	4	Dut
997	4.21e-12	0.262457	0.414	0.284	6.85e-08	4	Tbrg1
998	1.18e-10	0.262332	0.286	0.183	1.92e-06	4	Snx5
999	1.44e-17	0.262254	0.447	0.282	2.34e-13	4	Smpdl3a
1000	2.22e-13	0.259452	0.387	0.252	3.62e-09	4	Cuta
1001	4.99e-14	0.259344	0.435	0.292	8.13e-10	4	Zfand6
1002	2.17e-12	0.259178	0.841	0.749	3.53e-08	4	Btf3
1003	4.09e-12	0.257959	0.49	0.355	6.66e-08	4	Pkm
1004	7.87e-10	0.257386	0.59	0.454	1.28e-05	4	Elf1
1005	1.49e-07	0.256651	0.705	0.605	0.00243404	4	Ybx1
1006	2.94e-12	0.256206	0.539	0.4	4.79e-08	4	Capzb
1007	1.23e-17	0.256069	0.371	0.221	2e-13	4	Sod2
1008	8.72e-09	0.255254	0.578	0.439	0.00014194	4	Mtdh
1009	1.67e-11	0.254993	0.478	0.345	2.71e-07	4	Dnajb6
1010	1.65e-15	0.254778	0.337	0.2	2.68e-11	4	Anxa5
1011	3.63e-15	0.254648	0.285	0.165	5.91e-11	4	Ccdc124
1012	2.09e-18	0.254554	0.344	0.198	3.4e-14	4	Vdac3
1013	3.2e-09	0.253988	0.724	0.588	5.21e-05	4	Cd47
1014	6.82e-17	0.252813	0.267	0.146	1.11e-12	4	Glipr1
1015	6.52e-12	0.251379	0.525	0.377	1.06e-07	4	Prkar1a
1016	6.84e-11	0.250549	0.437	0.308	1.11e-06	4	Ghitm
1017	1.29e-133	1.66253	0.893	0.42	2.1e-129	5	Il2ra
1018	1.25e-150	1.51875	0.401	0.063	2.04e-146	5	Myb
1019	3.79e-91	1.46559	0.615	0.223	6.18e-87	5	Gpr83
1020	1.68e-85	1.3388	0.459	0.131	2.73e-81	5	Socs2
1021	2.19e-68	1.305	0.702	0.358	3.56e-64	5	Rgs1
1022	1.5e-86	1.23622	0.36	0.082	2.45e-82	5	Lrrc32
1023	8.16e-65	1.1661	0.339	0.09	1.33e-60	5	Lta
1024	4.51e-30	1.14156	0.406	0.199	7.34e-26	5	Fabp5
1025	3.34e-52	1.07345	0.714	0.416	5.44e-48	5	Il2rb
1026	3.63e-39	1.07262	0.459	0.218	5.91e-35	5	Xbp1
1027	2.12e-51	1.06275	0.515	0.23	3.45e-47	5	Ahcyl2
1028	1.68e-47	1.05965	0.559	0.267	2.74e-43	5	Socs1
1029	5.06e-55	1.03031	0.747	0.455	8.24e-51	5	Bcl2
1030	1.51e-35	1.02066	0.556	0.318	2.46e-31	5	Wdr82
1031	2.97e-42	1.00397	0.574	0.313	4.84e-38	5	Casp8
1032	2.45e-45	0.972835	0.457	0.191	3.99e-41	5	Cish
1033	4.77e-26	0.833758	0.291	0.123	7.76e-22	5	Myc
1034	2.7e-19	0.833372	0.388	0.226	4.4e-15	5	Ncoa7
1035	1.43e-24	0.819008	0.327	0.153	2.33e-20	5	Tmem64
1036	1.66e-24	0.800692	0.559	0.353	2.7e-20	5	Samsn1
1037	5.72e-32	0.773528	0.324	0.129	9.32e-28	5	Ecm1
1038	1.25e-16	0.719034	0.436	0.276	2.03e-12	5	Chchd10
1039	6.34e-18	0.705572	0.564	0.416	1.03e-13	5	Cast
1040	1.34e-30	0.683633	0.717	0.479	2.18e-26	5	Tnfrsf18
1041	5.46e-23	0.646205	0.712	0.52	8.89e-19	5	Sell
1042	1.55e-18	0.616646	0.311	0.158	2.53e-14	5	Slc14a1
1043	1.23e-16	0.615235	0.293	0.154	2e-12	5	Sgpp1
1044	2.07e-18	0.606862	0.724	0.602	3.38e-14	5	Cytip
1045	3.9e-23	0.602616	0.25	0.101	6.35e-19	5	Treml2
1046	1.91e-25	0.597098	0.314	0.135	3.12e-21	5	Rcn1
1047	3.51e-14	0.595838	0.569	0.452	5.72e-10	5	Samd9l
1048	5.45e-12	0.566323	0.528	0.413	8.88e-08	5	Eno1
1049	3.5e-28	0.555191	0.898	0.67	5.69e-24	5	Ikzf2
1050	6.75e-15	0.549825	0.686	0.562	1.1e-10	5	Foxp1
1051	1.58e-14	0.540083	0.418	0.269	2.57e-10	5	Rel
1052	2e-16	0.539194	0.745	0.615	3.26e-12	5	Izumo1r
1053	3.64e-14	0.516231	0.528	0.365	5.92e-10	5	Ift80
1054	3.03e-20	0.515048	0.936	0.886	4.94e-16	5	Ltb
1055	6.12e-10	0.514535	0.355	0.242	9.96e-06	5	Itga6
1056	2.64e-17	0.514289	0.809	0.689	4.3e-13	5	Ccnd2
1057	2.27e-08	0.507209	0.452	0.366	0.000369266	5	Snx3
1058	2.18e-10	0.494859	0.342	0.227	3.55e-06	5	Phc3
1059	3.13e-09	0.489641	0.589	0.507	5.09e-05	5	Cyb5a
1060	2.2e-07	0.487	0.314	0.223	0.00357821	5	Pdia4
1061	3.95e-06	0.471523	0.401	0.317	0.0643874	5	Etnk1
1062	5.68e-08	0.456889	0.319	0.223	0.000924694	5	P2ry10
1063	1.2e-10	0.453506	0.704	0.653	1.96e-06	5	Cd2
1064	3.64e-08	0.449645	0.38	0.275	0.000593133	5	Trib2
1065	9.87e-10	0.448131	0.643	0.523	1.61e-05	5	S1pr1
1066	0.000122013	0.440846	0.37	0.313	1	5	1700097N02Rik
1067	2.83e-27	0.438281	0.997	0.798	4.61e-23	5	Foxp3
1068	1.25e-07	0.436225	0.39	0.296	0.00203593	5	Cyth1
1069	4.57e-07	0.432091	0.388	0.296	0.00743437	5	Arid5b
1070	1.32e-08	0.431554	0.283	0.182	0.00021563	5	Mtmr3
1071	3.95e-08	0.425878	0.321	0.221	0.000643428	5	Slamf1
1072	3.92e-09	0.424552	0.707	0.657	6.38e-05	5	Akap13
1073	4.42e-08	0.419858	0.357	0.244	0.000719211	5	Iigp1
1074	3.11e-05	0.410692	0.398	0.33	0.506996	5	St8sia4
1075	1.36e-05	0.409463	0.344	0.27	0.221142	5	Twf2
1076	3.94e-07	0.405662	0.582	0.497	0.00640896	5	Pim1
1077	1.72e-07	0.403237	0.339	0.242	0.00279697	5	Igtp
1078	0.000520077	0.401726	0.329	0.274	1	5	Mkln1
1079	1.37e-06	0.39781	0.316	0.225	0.0222293	5	Ikzf4
1080	0.00156824	0.385898	0.388	0.356	1	5	Cd48
1081	3.6e-12	0.383616	0.793	0.679	5.87e-08	5	H2afz
1082	2.31e-15	0.371625	0.911	0.769	3.77e-11	5	Gm10260
1083	3.2e-06	0.366848	0.594	0.541	0.0521616	5	Pak2
1084	0.00223799	0.361704	0.362	0.32	1	5	2023-09-09
1085	0.000561989	0.35925	0.357	0.305	1	5	Rcsd1
1086	1.55e-12	0.356933	0.857	0.8	2.52e-08	5	Gm10076
1087	2.42e-05	0.351703	0.472	0.402	0.393569	5	Rab8b
1088	1.96e-05	0.34689	0.51	0.445	0.319774	5	Dnah8
1089	0.000416597	0.345736	0.38	0.321	1	5	Kbtbd11
1090	0.00137982	0.341552	0.385	0.338	1	5	Slc9a3r1
1091	3.37e-07	0.339533	0.704	0.645	0.00548599	5	Inpp4b
1092	0.00105281	0.339126	0.357	0.302	1	5	Ptms
1093	1.03e-05	0.338501	0.505	0.439	0.167205	5	Ndufb3
1094	0.000146663	0.330839	0.352	0.287	1	5	Rasgrp1
1095	0.00300242	0.327395	0.457	0.425	1	5	Nsd3
1096	0.000579485	0.323354	0.273	0.215	1	5	Agpat3
1097	0.000279266	0.322687	0.413	0.347	1	5	Txk
1098	2.29e-05	0.315783	0.457	0.383	0.372937	5	Tespa1
1099	0.000454809	0.314497	0.485	0.437	1	5	1810037I17Rik
1100	3.02e-07	0.313454	0.602	0.495	0.00491353	5	BC004004
1101	0.000264316	0.307963	0.329	0.27	1	5	Atp1a1
1102	0.00195727	0.307461	0.253	0.207	1	5	Pigx
1103	0.000348195	0.30628	0.51	0.465	1	5	Ankrd12
1104	2.53e-05	0.305901	0.306	0.223	0.411514	5	Igf2r
1105	0.00105237	0.304853	0.441	0.402	1	5	Thoc7
1106	0.00167603	0.299765	0.337	0.285	1	5	Ncoa3
1107	7.79e-12	0.295818	0.538	0.38	1.27e-07	5	Tnfrsf4
1108	0.000479482	0.295558	0.337	0.281	1	5	Hdac1
1109	1.33e-07	0.293363	0.577	0.462	0.00216875	5	Vim
1110	1.11e-05	0.286987	0.52	0.44	0.180303	5	Wnk1
1111	3.44e-05	0.284685	0.676	0.627	0.559961	5	Bcl11b
1112	2.97e-05	0.283482	0.61	0.55	0.483031	5	Sfi1
1113	0.00665593	0.28169	0.372	0.338	1	5	Hsbp1
1114	8.44e-06	0.281583	0.617	0.554	0.137379	5	Tbca
1115	0.00292951	0.280708	0.301	0.254	1	5	Erbin
1116	0.001027	0.271157	0.543	0.506	1	5	Rapgef6
1117	0.00602862	0.262504	0.258	0.211	1	5	Dtx3l
1118	0.00547395	0.261483	0.452	0.426	1	5	Lcp2
1119	0.00162211	0.25997	0.286	0.233	1	5	Skil
1120	0.00591906	0.25996	0.441	0.401	1	5	Ankrd44
1121	0.000834667	0.259039	0.342	0.285	1	5	Tap1
1122	0.00110354	0.250133	0.38	0.329	1	5	Hectd1
1123	5.61e-170	2.74491	0.284	0.024	9.13e-166	6	Penk
1124	1.25e-172	2.23971	0.845	0.264	2.04e-168	6	Maf
1125	0	2.20037	0.404	0.014	0	6	Klrg1
1126	8.41e-118	2.11461	0.834	0.372	1.37e-113	6	Tnfrsf4
1127	1.43e-108	1.78714	0.553	0.156	2.32e-104	6	Arl5a
1128	2.33e-101	1.73768	0.777	0.335	3.8e-97	6	Ctla4
1129	3.31e-105	1.69059	0.791	0.347	5.4e-101	6	Samsn1
1130	1.68e-113	1.67186	0.539	0.131	2.74e-109	6	Tnfrsf9
1131	4.04e-117	1.61853	0.974	0.761	6.57e-113	6	AW112010
1132	9.88e-85	1.50568	0.828	0.476	1.61e-80	6	Tnfrsf18
1133	2.56e-91	1.48042	0.527	0.153	4.16e-87	6	Icos
1134	1.54e-82	1.46298	0.493	0.132	2.5e-78	6	S100a4
1135	2.96e-100	1.45847	0.481	0.117	4.82e-96	6	Tnfrsf1b
1136	8.16e-101	1.43934	0.974	0.668	1.33e-96	6	Ikzf2
1137	9.24e-97	1.40914	0.261	0.036	1.51e-92	6	Ccl5
1138	1.46e-89	1.39314	0.819	0.397	2.37e-85	6	S100a11
1139	3.26e-84	1.38882	0.593	0.185	5.31e-80	6	S100a6
1140	1.27e-70	1.35646	0.908	0.709	2.07e-66	6	Srgn
1141	9.35e-100	1.31007	0.312	0.05	1.52e-95	6	Itgae
1142	8.1e-50	1.25857	0.524	0.226	1.32e-45	6	Bcl2a1b
1143	9.03e-60	1.23494	0.587	0.255	1.47e-55	6	Itm2c
1144	3.58e-159	1.22319	0.287	0.026	5.83e-155	6	Neb
1145	9.4e-56	1.19956	0.868	0.602	1.53e-51	6	Zfp36l1
1146	8.77e-46	1.19794	0.427	0.164	1.43e-41	6	Batf
1147	2.77e-43	1.16287	0.315	0.098	4.51e-39	6	Cd83
1148	5.66e-80	1.15363	0.946	0.742	9.21e-76	6	S100a10
1149	4.06e-45	1.14753	0.527	0.241	6.61e-41	6	Cd81
1150	4.35e-26	1.1309	0.639	0.451	7.08e-22	6	Nfkbia
1151	2.75e-51	1.12928	0.885	0.676	4.47e-47	6	H2afz
1152	8.09e-52	1.11982	0.436	0.154	1.32e-47	6	Wls
1153	8.65e-35	1.11252	0.493	0.241	1.41e-30	6	Gata3
1154	8.84e-45	1.09201	0.659	0.374	1.44e-40	6	Capg
1155	1.63e-37	1.08702	0.622	0.353	2.65e-33	6	Serinc3
1156	2.4e-50	1.08681	0.378	0.123	3.91e-46	6	Hacd3
1157	4.31e-38	1.034	0.427	0.181	7.03e-34	6	Dapp1
1158	2.74e-60	1.01228	0.923	0.768	4.46e-56	6	Ptprcap
1159	4.66e-39	1.00913	0.301	0.094	7.58e-35	6	Ly6a
1160	8.73e-44	1.00521	0.393	0.144	1.42e-39	6	Pglyrp1
1161	3.06e-30	0.973355	0.287	0.105	4.98e-26	6	Gadd45b
1162	1.12e-29	0.945908	0.358	0.154	1.83e-25	6	Rilpl2
1163	3.84e-28	0.931468	0.35	0.151	6.25e-24	6	Glcci1
1164	1.27e-27	0.919395	0.536	0.309	2.07e-23	6	Tox
1165	1.05e-39	0.888104	0.37	0.139	1.7e-35	6	Smco4
1166	4.75e-34	0.885401	0.341	0.129	7.74e-30	6	Cst7
1167	4.67e-29	0.881647	0.576	0.339	7.6e-25	6	Agfg1
1168	8.01e-24	0.875668	0.473	0.269	1.31e-19	6	Tank
1169	1.01e-50	0.868862	0.255	0.059	1.65e-46	6	Itgb8
1170	5.61e-27	0.862667	0.536	0.319	9.13e-23	6	M6pr
1171	2.46e-19	0.861978	0.668	0.543	4e-15	6	Psme2
1172	1.11e-52	0.860485	0.957	0.819	1.82e-48	6	Cd3g
1173	9.45e-23	0.852548	0.625	0.412	1.54e-18	6	Il7r
1174	3.23e-32	0.85113	0.774	0.592	5.26e-28	6	Ndfip1
1175	3.24e-30	0.849496	0.341	0.137	5.28e-26	6	Gprin3
1176	2.18e-31	0.836226	0.401	0.178	3.55e-27	6	Cmtm7
1177	1.69e-18	0.836002	0.39	0.217	2.75e-14	6	Pmepa1
1178	4.65e-22	0.830603	0.424	0.229	7.58e-18	6	Ly6e
1179	4.6e-23	0.829142	0.395	0.203	7.49e-19	6	Cd44
1180	2.02e-21	0.828264	0.272	0.114	3.29e-17	6	Il18r1
1181	1.17e-25	0.819644	0.404	0.198	1.9e-21	6	Tmem154
1182	2.44e-17	0.795887	0.39	0.224	3.97e-13	6	Malt1
1183	1.36e-20	0.789878	0.321	0.152	2.22e-16	6	Med15
1184	1.3e-29	0.785931	0.327	0.132	2.12e-25	6	Lrba
1185	9.6e-25	0.778082	0.564	0.343	1.56e-20	6	Tnfaip8
1186	1.1e-37	0.770339	0.88	0.722	1.79e-33	6	Trac
1187	1.8e-24	0.767512	0.281	0.112	2.93e-20	6	N4bp1
1188	1.99e-18	0.767331	0.567	0.404	3.24e-14	6	Sec11c
1189	1.19e-19	0.763842	0.35	0.179	1.93e-15	6	Dusp1
1190	2.91e-25	0.753406	0.673	0.451	4.74e-21	6	Gimap7
1191	1.45e-26	0.740689	0.759	0.614	2.36e-22	6	Ptp4a2
1192	7.05e-19	0.740481	0.527	0.345	1.15e-14	6	Hif1a
1193	1.17e-15	0.735993	0.398	0.241	1.91e-11	6	Ptpn7
1194	8.99e-20	0.731348	0.309	0.148	1.46e-15	6	Glipr1
1195	7.19e-23	0.730056	0.926	0.843	1.17e-18	6	Ifi27l2a
1196	4.83e-13	0.719834	0.418	0.275	7.87e-09	6	Ptpn22
1197	8.79e-26	0.718204	0.708	0.499	1.43e-21	6	AC149090.1
1198	8.91e-18	0.714602	0.35	0.178	1.45e-13	6	Sapcd1
1199	4.34e-17	0.707465	0.533	0.354	7.06e-13	6	2310001H17Rik
1200	1.19e-18	0.704393	0.476	0.297	1.93e-14	6	Itgal
1201	2.61e-15	0.703997	0.436	0.28	4.24e-11	6	Plaat3
1202	6.25e-19	0.703199	0.309	0.147	1.02e-14	6	Id2
1203	6.9e-17	0.701038	0.364	0.203	1.12e-12	6	Vmp1
1204	4.17e-23	0.697007	0.289	0.121	6.8e-19	6	Vps54
1205	1.62e-56	0.69587	0.991	0.957	2.64e-52	6	H2-K1
1206	7.06e-13	0.694724	0.295	0.164	1.15e-08	6	Ptger4
1207	5.24e-44	0.694681	0.954	0.883	8.53e-40	6	Cd3e
1208	5.66e-24	0.691623	0.289	0.118	9.22e-20	6	Bcl2l15
1209	7.5e-17	0.689583	0.513	0.334	1.22e-12	6	Lgals1
1210	3.51e-20	0.6856	0.622	0.446	5.71e-16	6	Sdf4
1211	6.69e-29	0.685234	0.252	0.085	1.09e-24	6	Kif13b
1212	1.01e-18	0.681116	0.387	0.218	1.65e-14	6	Naa10
1213	1.72e-24	0.665468	0.797	0.683	2.8e-20	6	Cyba
1214	1.14e-10	0.657911	0.499	0.365	1.86e-06	6	Rgs1
1215	2.58e-09	0.65284	0.479	0.358	4.19e-05	6	Nrip1
1216	5.72e-15	0.651865	0.413	0.251	9.32e-11	6	Hist1h1e
1217	3e-78	0.649217	0.997	0.991	4.89e-74	6	H2-D1
1218	8.53e-20	0.646855	0.269	0.116	1.39e-15	6	A430093F15Rik
1219	4.45e-12	0.642872	0.659	0.508	7.24e-08	6	Junb
1220	3.43e-15	0.638666	0.381	0.226	5.59e-11	6	Spint2
1221	7.86e-09	0.63604	0.315	0.211	0.000127978	6	Orai1
1222	5.34e-13	0.63554	0.395	0.251	8.7e-09	6	Rbl2
1223	4.93e-14	0.63018	0.544	0.396	8.03e-10	6	Mdh1
1224	5.4e-19	0.624001	0.751	0.62	8.8e-15	6	Lcp1
1225	2.79e-18	0.622046	0.264	0.117	4.55e-14	6	Rora
1226	8.71e-09	0.620016	0.433	0.316	0.000141809	6	Jarid2
1227	4.45e-15	0.613428	0.464	0.301	7.25e-11	6	Lamtor4
1228	4.02e-17	0.611258	0.255	0.114	6.54e-13	6	I730030J21Rik
1229	1.83e-17	0.611181	0.734	0.572	2.98e-13	6	Lbh
1230	9.12e-19	0.611046	0.258	0.114	1.48e-14	6	Glrx
1231	1.93e-14	0.60934	0.292	0.153	3.15e-10	6	Syt11
1232	1.16e-15	0.600719	0.307	0.161	1.88e-11	6	Mif4gd
1233	8.68e-18	0.600142	0.814	0.703	1.41e-13	6	Ubl5
1234	1.95e-13	0.598114	0.266	0.137	3.18e-09	6	AU020206
1235	2.66e-09	0.594106	0.424	0.303	4.33e-05	6	Gimap5
1236	3.12e-09	0.591771	0.438	0.327	5.08e-05	6	Akna
1237	8.06e-05	0.590071	0.341	0.273	1	6	Gpr183
1238	3.58e-14	0.588958	0.527	0.363	5.83e-10	6	Reep5
1239	2.21e-10	0.586209	0.616	0.497	3.6e-06	6	Pim1
1240	3.12e-11	0.584345	0.418	0.287	5.09e-07	6	Smpdl3a
1241	2.44e-11	0.577226	0.301	0.175	3.98e-07	6	Psen2
1242	1.12e-09	0.574133	0.407	0.286	1.83e-05	6	Cab39
1243	2.7e-17	0.566635	0.791	0.69	4.39e-13	6	Laptm5
1244	4.99e-07	0.565278	0.418	0.329	0.00813165	6	Grap
1245	6.69e-15	0.562837	0.266	0.131	1.09e-10	6	Fam129a
1246	4.02e-27	0.560305	0.968	0.885	6.55e-23	6	Shisa5
1247	1.53e-17	0.560229	0.272	0.124	2.49e-13	6	Gm28112
1248	1.11e-11	0.560155	0.404	0.27	1.8e-07	6	Ctsb
1249	1.8e-15	0.559479	0.705	0.562	2.92e-11	6	Ppib
1250	3.71e-10	0.557891	0.45	0.32	6.05e-06	6	Ier5
1251	1.61e-06	0.557796	0.367	0.271	0.0262064	6	Rel
1252	5.14e-11	0.553441	0.53	0.411	8.37e-07	6	S100a13
1253	2.12e-10	0.551591	0.398	0.272	3.45e-06	6	Pkp3
1254	1.35e-11	0.550919	0.742	0.652	2.2e-07	6	Cd2
1255	1.1e-14	0.545521	0.628	0.489	1.79e-10	6	Micos10
1256	2.26e-07	0.545508	0.484	0.397	0.00367491	6	Ramp1
1257	2.24e-09	0.544095	0.35	0.233	3.64e-05	6	Sla
1258	9.53e-10	0.542496	0.43	0.313	1.55e-05	6	Plgrkt
1259	3.32e-44	0.542421	0.989	0.978	5.41e-40	6	B2m
1260	2.74e-15	0.541347	0.771	0.615	4.46e-11	6	Izumo1r
1261	6.58e-12	0.54115	0.507	0.366	1.07e-07	6	Vamp8
1262	1.7e-07	0.538116	0.562	0.494	0.00276452	6	Hspa5
1263	9.83e-09	0.533181	0.487	0.383	0.000160072	6	Prkar1a
1264	1.07e-08	0.532792	0.633	0.533	0.000173684	6	Peli1
1265	3.66e-09	0.530369	0.361	0.245	5.96e-05	6	Igflr1
1266	8.88e-10	0.530119	0.327	0.207	1.45e-05	6	Nfatc1
1267	9.72e-10	0.526279	0.347	0.226	1.58e-05	6	Lrp10
1268	7.33e-13	0.524577	0.441	0.295	1.19e-08	6	Prr13
1269	8.41e-25	0.523209	0.911	0.82	1.37e-20	6	Cd3d
1270	1.14e-13	0.519835	0.891	0.887	1.86e-09	6	Ltb
1271	2.31e-14	0.516589	0.559	0.4	3.76e-10	6	Rab8b
1272	6.39e-23	0.515181	0.946	0.893	1.04e-18	6	H3f3b
1273	1.29e-10	0.514228	0.444	0.318	2.11e-06	6	Cd164
1274	2.13e-11	0.50983	0.292	0.166	3.46e-07	6	Timp2
1275	4.04e-13	0.509642	0.665	0.541	6.58e-09	6	H2-Q7
1276	1.07e-09	0.504581	0.576	0.477	1.74e-05	6	Fis1
1277	4.25e-07	0.500544	0.281	0.188	0.00691886	6	Impa1
1278	2.12e-08	0.497108	0.327	0.22	0.000345664	6	Nr3c1
1279	5.8e-14	0.495849	0.719	0.582	9.44e-10	6	Arl6ip1
1280	1.68e-09	0.49335	0.344	0.221	2.73e-05	6	Slamf1
1281	1.01e-08	0.493242	0.415	0.297	0.000164267	6	Sh2d1a
1282	4.83e-05	0.492611	0.278	0.204	0.786287	6	Fabp5
1283	3.25e-12	0.489847	0.696	0.579	5.29e-08	6	Abracl
1284	4.79e-11	0.489609	0.255	0.138	7.8e-07	6	AI504432
1285	3.37e-07	0.48958	0.467	0.354	0.00549294	6	Gbp7
1286	3.3e-09	0.489276	0.255	0.149	5.37e-05	6	Crlf2
1287	1.61e-10	0.484558	0.696	0.617	2.62e-06	6	Ucp2
1288	2.7e-10	0.48435	0.275	0.159	4.4e-06	6	Eva1b
1289	5.07e-10	0.470569	0.65	0.549	8.26e-06	6	Cd27
1290	2.45e-09	0.468681	0.372	0.252	3.99e-05	6	Sdhaf1
1291	9.98e-12	0.468409	0.55	0.394	1.63e-07	6	Gimap8
1292	5.25e-06	0.467822	0.281	0.196	0.0854972	6	Ssbp3
1293	2.76e-05	0.467426	0.272	0.197	0.449252	6	Cish
1294	1.35e-07	0.464914	0.266	0.169	0.00219683	6	Gpr65
1295	1.49e-06	0.464498	0.499	0.419	0.0243356	6	Fyn
1296	3.44e-08	0.464441	0.456	0.355	0.000559544	6	Spcs1
1297	1.35e-07	0.46368	0.395	0.294	0.00220291	6	Mxd4
1298	1.41e-11	0.463016	0.748	0.642	2.29e-07	6	Clic1
1299	2.61e-07	0.460883	0.332	0.224	0.00424747	6	Ikzf4
1300	4.7e-07	0.459989	0.53	0.445	0.00764786	6	Rnaset2a
1301	3.26e-07	0.459403	0.493	0.406	0.005305	6	Capzb
1302	2.57e-08	0.455054	0.266	0.164	0.000419088	6	Mrps6
1303	2.06e-08	0.45391	0.252	0.152	0.000335283	6	Mthfsl
1304	2.26e-05	0.452274	0.53	0.471	0.368088	6	Map1lc3b
1305	0.000462819	0.451641	0.364	0.308	1	6	Prkca
1306	6.17e-10	0.451248	0.662	0.569	1e-05	6	Gabarap
1307	2.25e-07	0.44722	0.298	0.197	0.00366857	6	Slfn8
1308	7.26e-05	0.447121	0.281	0.205	1	6	Cyth4
1309	2.53e-14	0.445016	0.837	0.76	4.12e-10	6	Elob
1310	5.83e-06	0.444566	0.261	0.178	0.0950005	6	Nucb1
1311	1.78e-06	0.444327	0.252	0.166	0.0290548	6	Dusp5
1312	5.17e-05	0.442773	0.378	0.297	0.842717	6	Arid5b
1313	1.06e-12	0.442156	0.842	0.766	1.73e-08	6	Fxyd5
1314	2.79e-07	0.441602	0.642	0.587	0.00454864	6	Il2rg
1315	4.37e-06	0.438284	0.384	0.301	0.0712427	6	Hcls1
1316	2.06e-06	0.437384	0.312	0.219	0.0334991	6	Zap70
1317	2.99e-08	0.437153	0.607	0.524	0.000487659	6	Edf1
1318	5.65e-05	0.436909	0.395	0.315	0.919427	6	Irf1
1319	9.79e-09	0.435503	0.656	0.576	0.000159506	6	Spcs2
1320	9.78e-12	0.434826	0.713	0.611	1.59e-07	6	Ndufa13
1321	2.63e-07	0.434662	0.33	0.224	0.00427636	6	Ephx1
1322	1.58e-05	0.432929	0.415	0.341	0.257768	6	Tecr
1323	9.59e-06	0.43238	0.404	0.319	0.156128	6	Il27ra
1324	1.77e-05	0.426907	0.255	0.176	0.2887	6	Zbtb38
1325	7.74e-06	0.426851	0.258	0.177	0.126074	6	Dnajc1
1326	3.3e-07	0.426479	0.441	0.339	0.00536807	6	Sh3bgrl
1327	3.06e-06	0.425989	0.67	0.63	0.049832	6	H2-T23
1328	4.46e-06	0.425653	0.35	0.254	0.0726129	6	Sema4d
1329	1.87e-05	0.425331	0.473	0.402	0.303935	6	Gnb2
1330	6.98e-06	0.425107	0.335	0.248	0.113683	6	Birc2
1331	6.21e-11	0.420655	0.593	0.42	1.01e-06	6	Il2rb
1332	1.05e-05	0.419534	0.289	0.204	0.170183	6	Elk3
1333	3.22e-13	0.418985	0.837	0.759	5.24e-09	6	Cox8a
1334	4.17e-07	0.41871	0.444	0.337	0.00679781	6	Arf6
1335	1.72e-06	0.418281	0.479	0.392	0.0280749	6	H2-T22
1336	6.86e-05	0.417186	0.252	0.177	1	6	Ccng1
1337	1.54e-06	0.414716	0.404	0.311	0.0251149	6	Fnbp1
1338	5.52e-06	0.413383	0.395	0.31	0.0899688	6	Esd
1339	4e-05	0.412183	0.513	0.458	0.651639	6	Fkbp3
1340	4.4e-07	0.411672	0.628	0.556	0.00716625	6	Gpx4
1341	1.24e-06	0.411421	0.344	0.248	0.0202134	6	Parp14
1342	0.00090929	0.410121	0.387	0.328	1	6	Zbtb20
1343	5.03e-12	0.409613	0.94	0.891	8.19e-08	6	Mbnl1
1344	1.22e-06	0.409081	0.461	0.362	0.0198583	6	Ypel3
1345	3.04e-06	0.408122	0.433	0.338	0.0494997	6	Tmem59
1346	5.17e-09	0.405814	0.791	0.721	8.43e-05	6	Psme1
1347	2.82e-10	0.405682	0.736	0.64	4.59e-06	6	Gimap6
1348	0.00367889	0.404784	0.372	0.334	1	6	Rab2a
1349	1.19e-05	0.403574	0.272	0.189	0.193512	6	Cdk17
1350	3.63e-07	0.403394	0.355	0.255	0.00590411	6	Aebp2
1351	3.53e-11	0.403068	0.782	0.695	5.75e-07	6	Chchd2
1352	7.86e-07	0.402537	0.587	0.512	0.0128024	6	Sec62
1353	2.67e-09	0.400696	0.862	0.827	4.34e-05	6	Actg1
1354	9.29e-05	0.400664	0.479	0.395	1	6	Dock10
1355	5.25e-11	0.40053	0.799	0.722	8.55e-07	6	Sem1
1356	9.65e-08	0.399649	0.628	0.544	0.00157181	6	Prdx1
1357	3.35e-10	0.397332	0.639	0.529	5.46e-06	6	Ndufb7
1358	3.34e-07	0.397068	0.553	0.446	0.00544179	6	Itga4
1359	4.47e-07	0.39592	0.438	0.336	0.00728307	6	Hsbp1
1360	8.74e-06	0.395138	0.633	0.583	0.142293	6	Cd53
1361	9.41e-06	0.394125	0.338	0.251	0.153278	6	Tmem256
1362	1.54e-07	0.393283	0.673	0.596	0.00250278	6	Cdk2ap2
1363	0.000504644	0.391821	0.272	0.211	1	6	Rrbp1
1364	5.71e-07	0.391232	0.456	0.36	0.00929108	6	Pet100
1365	1.6e-05	0.387871	0.281	0.202	0.259983	6	Cstb
1366	9.17e-07	0.387207	0.501	0.405	0.0149257	6	Dek
1367	1.85e-06	0.386708	0.524	0.448	0.0300668	6	Cd37
1368	4.64e-06	0.386208	0.395	0.302	0.0756209	6	Traf1
1369	1.64e-05	0.384026	0.367	0.283	0.266694	6	Msi2
1370	5.82e-09	0.38299	0.794	0.746	9.48e-05	6	Gng5
1371	2.53e-05	0.380391	0.516	0.439	0.411332	6	Selenok
1372	7.07e-09	0.380255	0.716	0.629	0.000115113	6	Stk17b
1373	3.39e-10	0.379223	0.819	0.708	5.52e-06	6	Srrm2
1374	0.00074957	0.379056	0.367	0.304	1	6	Ralbp1
1375	3.53e-13	0.377556	0.951	0.931	5.76e-09	6	Ubb
1376	3.66e-05	0.374276	0.447	0.372	0.59607	6	Ndufs6
1377	7.29e-06	0.373137	0.284	0.199	0.118791	6	Tmbim4
1378	3.44e-06	0.372727	0.679	0.627	0.0559616	6	Gnas
1379	0.00199071	0.372631	0.507	0.466	1	6	Ankrd12
1380	0.000372092	0.371349	0.39	0.322	1	6	Prdx5
1381	2.05e-05	0.366606	0.519	0.44	0.334578	6	Wnk1
1382	2.34e-07	0.365207	0.628	0.535	0.00381562	6	Arpc1b
1383	4.54e-06	0.364991	0.275	0.19	0.0739403	6	Ncf4
1384	5.22e-06	0.363229	0.521	0.454	0.0849855	6	Tmbim6
1385	2.09e-05	0.361477	0.341	0.256	0.340194	6	Tmem173
1386	0.000641914	0.360735	0.258	0.194	1	6	Nfat5
1387	0.000859198	0.360162	0.307	0.247	1	6	Ppp4c
1388	3.74e-06	0.359928	0.504	0.425	0.0608662	6	Lcp2
1389	0.000324861	0.359388	0.458	0.391	1	6	Ier3ip1
1390	2.38e-12	0.358657	0.905	0.86	3.88e-08	6	Atp5e
1391	1.1e-05	0.357837	0.676	0.625	0.178584	6	Gimap1
1392	1.31e-08	0.355302	0.802	0.765	0.000213753	6	Hmgb1
1393	0.0005513	0.353104	0.501	0.448	1	6	Calr
1394	1.78e-05	0.35247	0.59	0.533	0.289752	6	Psenen
1395	7.25e-06	0.352241	0.261	0.178	0.118063	6	Rab37
1396	0.00138536	0.351075	0.355	0.296	1	6	Trp53inp1
1397	4.33e-05	0.350864	0.599	0.531	0.704473	6	Tomm6
1398	5.58e-05	0.35077	0.513	0.469	0.908103	6	Tmem50a
1399	8.99e-06	0.350062	0.665	0.593	0.146379	6	Uqcr10
1400	0.000142697	0.349365	0.37	0.292	1	6	Bmyc
1401	0.00144042	0.343735	0.324	0.266	1	6	Zcchc9
1402	0.00058287	0.343151	0.358	0.298	1	6	Rer1
1403	0.000515095	0.341473	0.499	0.443	1	6	Srrm1
1404	3.52e-05	0.339561	0.35	0.268	0.573563	6	Picalm
1405	0.00912494	0.3394	0.264	0.22	1	6	Crbn
1406	0.00041447	0.336706	0.418	0.349	1	6	Rabgap1l
1407	1.29e-07	0.336478	0.722	0.636	0.00209373	6	Gapdh
1408	0.00107814	0.334583	0.315	0.257	1	6	Zdhhc18
1409	8.6e-05	0.333637	0.519	0.46	1	6	Elf1
1410	0.000198626	0.333207	0.516	0.465	1	6	Irf2
1411	0.0011092	0.332994	0.295	0.24	1	6	Eif4e2
1412	0.00230864	0.332745	0.358	0.307	1	6	Tmem160
1413	2.49e-05	0.331795	0.501	0.425	0.405357	6	Atox1
1414	0.000580147	0.331175	0.295	0.229	1	6	Phc3
1415	6.02e-11	0.329945	0.88	0.822	9.81e-07	6	Rac2
1416	2.36e-05	0.329853	0.628	0.571	0.384656	6	Tmem258
1417	1.98e-05	0.327089	0.516	0.436	0.321854	6	1810037I17Rik
1418	6.9e-06	0.325806	0.562	0.485	0.112352	6	Ndufb9
1419	2.95e-05	0.325515	0.384	0.306	0.480013	6	Txndc17
1420	8.31e-08	0.325327	0.854	0.804	0.00135257	6	Cox7c
1421	2.56e-05	0.324744	0.562	0.479	0.417684	6	Atp6v0e
1422	2.07e-05	0.323602	0.587	0.513	0.336699	6	Atp6v1f
1423	5.96e-06	0.323192	0.544	0.442	0.0970345	6	Ahnak
1424	3.26e-05	0.32301	0.931	0.939	0.530256	6	Cd52
1425	0.00182444	0.322625	0.272	0.215	1	6	Rbpj
1426	0.000956698	0.320671	0.421	0.363	1	6	Snw1
1427	5.93e-05	0.320329	0.524	0.461	0.965575	6	Sumo1
1428	6.96e-12	0.32002	0.98	0.966	1.13e-07	6	Pfn1
1429	0.00367079	0.319914	0.304	0.249	1	6	Ube2r2
1430	0.000711624	0.318997	0.513	0.464	1	6	Uqcrb
1431	0.000452983	0.318419	0.266	0.202	1	6	Ech1
1432	2.55e-05	0.318098	0.59	0.522	0.415386	6	Sri
1433	0.000865602	0.317368	0.272	0.208	1	6	Vsir
1434	0.00982924	0.317104	0.309	0.265	1	6	Fam3c
1435	0.000190927	0.31689	0.559	0.513	1	6	2023-09-07
1436	4.84e-05	0.316801	0.461	0.386	0.788093	6	H2afv
1437	0.00029266	0.316331	0.481	0.423	1	6	Rock1
1438	0.00043607	0.315825	0.424	0.362	1	6	Vasp
1439	0.00937008	0.314711	0.41	0.376	1	6	Ccdc12
1440	7.03e-06	0.314498	0.877	0.842	0.114537	6	mt-Nd3
1441	0.000309954	0.312489	0.264	0.193	1	6	Pglyrp2
1442	0.000739727	0.311176	0.547	0.51	1	6	Csnk1a1
1443	0.00594053	0.310874	0.364	0.317	1	6	Fundc2
1444	0.00131614	0.310628	0.67	0.645	1	6	Jund
1445	0.000151128	0.310502	0.585	0.542	1	6	Pak2
1446	0.000421686	0.309337	0.278	0.213	1	6	Prkch
1447	6.78e-05	0.309136	0.556	0.483	1	6	Pomp
1448	1.82e-05	0.305565	0.415	0.328	0.297008	6	Hectd1
1449	0.00361496	0.305206	0.375	0.327	1	6	Rab10
1450	0.00027712	0.304057	0.562	0.519	1	6	Ndufa1
1451	0.00782599	0.30382	0.312	0.272	1	6	Bcap31
1452	2.44e-05	0.303716	0.676	0.611	0.397627	6	Tsc22d4
1453	0.000328511	0.303683	0.441	0.38	1	6	Tapbp
1454	9.78e-06	0.303219	0.43	0.336	0.159227	6	Slc9a3r1
1455	6.99e-06	0.302907	0.539	0.443	0.113814	6	Txn1
1456	0.000294268	0.301772	0.536	0.47	1	6	Ssb
1457	0.00101909	0.299408	0.547	0.51	1	6	Rap1b
1458	0.00236598	0.299386	0.264	0.207	1	6	Pigx
1459	0.00138459	0.297691	0.473	0.43	1	6	Atrx
1460	0.00276641	0.296284	0.456	0.421	1	6	Kmt2e
1461	0.00233959	0.295503	0.264	0.213	1	6	Tm9sf2
1462	0.00441669	0.295286	0.33	0.275	1	6	Csnk2b
1463	0.00109883	0.294736	0.484	0.432	1	6	Arf1
1464	0.00168136	0.294724	0.433	0.375	1	6	Rinl
1465	0.000448773	0.293228	0.507	0.444	1	6	Paip2
1466	0.000606811	0.292429	0.352	0.289	1	6	Tbrg1
1467	0.00770743	0.291208	0.433	0.399	1	6	Tmem134
1468	0.000753977	0.290963	0.378	0.317	1	6	Cox20
1469	0.000459756	0.290027	0.272	0.206	1	6	Cntrl
1470	0.00169115	0.289762	0.404	0.343	1	6	Atpif1
1471	0.00172522	0.28853	0.272	0.214	1	6	Esco1
1472	0.00574114	0.288107	0.427	0.39	1	6	Tgfb1
1473	0.000215723	0.288079	0.662	0.62	1	6	Atp5j
1474	2.38e-05	0.286839	0.436	0.341	0.386803	6	BE692007
1475	0.00247072	0.286243	0.324	0.268	1	6	Utp11
1476	0.00776176	0.285591	0.384	0.347	1	6	Cyld
1477	2.91e-06	0.285412	0.851	0.797	0.0473706	6	Gimap3
1478	0.00106673	0.285085	0.315	0.254	1	6	Ube2h
1479	0.00402209	0.284677	0.252	0.205	1	6	Pts
1480	0.00482766	0.284151	0.321	0.27	1	6	Wdr83os
1481	8.15e-07	0.282908	0.848	0.807	0.0132678	6	Cox6c
1482	0.000839662	0.281595	0.269	0.209	1	6	Tmem208
1483	0.00689074	0.279886	0.51	0.483	1	6	Dad1
1484	0.000192571	0.279594	0.507	0.442	1	6	Hsp90b1
1485	0.00328592	0.279524	0.358	0.304	1	6	Chrac1
1486	0.00254575	0.277546	0.393	0.339	1	6	Psmb2
1487	0.000804585	0.276477	0.547	0.497	1	6	Atp5d
1488	0.00422484	0.276393	0.355	0.302	1	6	Dcun1d5
1489	0.00109959	0.276289	0.573	0.519	1	6	Arpc5
1490	0.00140884	0.276211	0.458	0.403	1	6	Rap1a
1491	0.00036585	0.275261	0.496	0.436	1	6	Mier1
1492	0.000888328	0.27448	0.57	0.52	1	6	Arpp19
1493	5.42e-05	0.273971	0.662	0.609	0.882498	6	Pnrc1
1494	0.000560749	0.27397	0.544	0.49	1	6	Pdia3
1495	6.99e-05	0.272339	0.573	0.494	1	6	Atp5g3
1496	0.00240961	0.27228	0.281	0.225	1	6	Pdia6
1497	7.34e-05	0.270513	0.653	0.602	1	6	Cox7b
1498	1.56e-07	0.268194	0.891	0.864	0.00253863	6	Myl6
1499	4.28e-05	0.267661	0.607	0.534	0.69625	6	Uqcr11
1500	0.000436932	0.267447	0.653	0.639	1	6	Ndufb1-ps
1501	8.27e-05	0.267275	0.421	0.332	1	6	Nfkb1
1502	0.00704	0.266472	0.438	0.408	1	6	Sh3glb1
1503	0.00474439	0.266327	0.258	0.209	1	6	Phf11b
1504	0.00968339	0.266128	0.301	0.256	1	6	Snrpb2
1505	0.00526452	0.266122	0.33	0.28	1	6	Rab21
1506	0.000600122	0.265607	0.304	0.236	1	6	Ankrd17
1507	0.000646154	0.265441	0.487	0.423	1	6	Metap2
1508	0.00699734	0.26363	0.407	0.362	1	6	Cd4
1509	0.00515039	0.263548	0.433	0.388	1	6	Bnip3l
1510	0.0033272	0.262362	0.576	0.54	1	6	Cox17
1511	0.00410822	0.260887	0.324	0.272	1	6	Calm3
1512	5.74e-05	0.257321	0.765	0.731	0.934865	6	Tma7
1513	0.00165616	0.256519	0.347	0.285	1	6	Tap1
1514	0.000800938	0.256116	0.372	0.301	1	6	Diaph1
1515	0.00392907	0.254373	0.269	0.213	1	6	Kdm6b
1516	0.000492164	0.254009	0.318	0.248	1	6	Fam169b
1517	0.00730571	0.253619	0.301	0.253	1	6	Etfb
1518	0.0036716	0.253401	0.519	0.477	1	6	Cox5a
1519	0.000318888	0.253343	0.691	0.647	1	6	Actr3
1520	0.00283886	0.253177	0.309	0.255	1	6	Dynlrb1
1521	7.22e-05	0.252573	0.393	0.306	1	6	Gpr174
1522	0.006549	0.252416	0.501	0.465	1	6	Ppp1r18
1523	0.000757956	0.252005	0.258	0.19	1	6	Notch1
1524	0.000823236	0.251495	0.521	0.466	1	6	Ddx24
1525	0	5.84776	0.837	0.04	0	7	Cd74
1526	0	5.28287	0.796	0.025	0	7	H2-Aa
1527	0	4.84383	0.752	0.024	0	7	H2-Eb1
1528	0	4.76374	0.789	0.037	0	7	H2-Ab1
1529	0	4.51889	0.976	0.008	0	7	Tyrobp
1530	4.61e-234	3.76962	0.986	0.326	7.51e-230	7	Cst3
1531	0	3.6699	0.864	0.011	0	7	Plac8
1532	0	3.6608	0.367	0.005	0	7	Lyz2
1533	0	3.29299	0.966	0.01	0	7	Fcer1g
1534	0	2.99746	0.891	0.034	0	7	Ifi30
1535	0	2.97716	0.707	0.038	0	7	Ifitm3
1536	0	2.87071	0.429	0.006	0	7	Atf3
1537	0	2.76957	0.333	0.003	0	7	Ccl4
1538	1.91e-237	2.73065	0.653	0.087	3.12e-233	7	Fos
1539	0	2.51595	0.908	0.003	0	7	Alox5ap
1540	0	2.51006	0.371	0.015	0	7	Ly6c2
1541	1.79e-165	2.40555	0.49	0.07	2.91e-161	7	Irf8
1542	5.47e-105	2.3855	0.748	0.234	8.92e-101	7	Jun
1543	6.26e-79	2.38256	0.673	0.218	1.02e-74	7	Bst2
1544	0	2.35293	0.789	0.01	0	7	Rnase6
1545	0	2.35201	0.83	0.01	0	7	Ctsh
1546	0	2.32779	0.857	0.02	0	7	Mef2c
1547	0	2.28528	0.656	0.028	0	7	Lgals3
1548	1.35e-45	2.27902	0.578	0.249	2.19e-41	7	Tbc1d4
1549	0	2.2613	0.844	0.008	0	7	Napsa
1550	0	2.20981	0.796	0.011	0	7	Plek
1551	0	2.20252	0.558	0.035	0	7	Tcf4
1552	0	2.17347	0.374	0.001	0	7	Il1b
1553	0	2.16389	0.803	0.098	0	7	Rgs2
1554	5.63e-261	2.09816	0.925	0.182	9.17e-257	7	Gm2a
1555	6.19e-130	2.06436	0.786	0.247	1.01e-125	7	Psap
1556	2.59e-271	2.0622	0.595	0.062	4.22e-267	7	Ifitm2
1557	0	2.00523	0.82	0.013	0	7	Lyn
1558	8.67e-264	1.99838	0.765	0.109	1.41e-259	7	Ms4a6c
1559	5.77e-245	1.9876	0.942	0.178	9.4e-241	7	S100a6
1560	7.93e-304	1.97604	0.83	0.117	1.29e-299	7	H2-DMa
1561	0	1.97555	0.524	0.026	0	7	Pmaip1
1562	0	1.96536	0.711	0.002	0	7	Plbd1
1563	2.6e-170	1.9549	0.99	0.395	4.23e-166	7	Gpx1
1564	0	1.9284	0.701	0.063	0	7	Cybb
1565	0	1.91979	0.776	0.004	0	7	Spi1
1566	0	1.90366	0.759	0.006	0	7	Ly86
1567	3.13e-34	1.85672	0.714	0.46	5.1e-30	7	Crip1
1568	0	1.84085	0.741	0.015	0	7	Marcks
1569	0	1.83555	0.524	0.029	0	7	Ccr2
1570	0	1.81846	0.51	0.006	0	7	Mpeg1
1571	1.43e-74	1.81724	0.918	0.428	2.34e-70	7	Sat1
1572	0	1.81644	0.395	0.015	0	7	Apoe
1573	1.53e-106	1.8079	0.466	0.088	2.49e-102	7	Egr1
1574	1.75e-170	1.77538	0.622	0.104	2.84e-166	7	Lst1
1575	0	1.77418	0.544	0.013	0	7	H2-DMb2
1576	0	1.7425	0.656	0.003	0	7	H2-DMb1
1577	2.54e-126	1.72162	0.813	0.229	4.14e-122	7	Zfp36
1578	0	1.70752	0.306	0.003	0	7	Ier3
1579	2.82e-107	1.68439	0.949	0.396	4.59e-103	7	S100a11
1580	2.7e-66	1.61481	0.861	0.399	4.4e-62	7	Btg2
1581	0	1.59019	0.439	0.017	0	7	Tmem176b
1582	2.66e-252	1.58924	0.85	0.139	4.33e-248	7	Ctsz
1583	0	1.58154	0.639	0.006	0	7	Bcl11a
1584	0	1.5812	0.776	0.039	0	7	Unc93b1
1585	0	1.57099	0.575	0.01	0	7	Zeb2
1586	2.74e-181	1.56804	0.731	0.127	4.46e-177	7	S100a4
1587	9.57e-141	1.54083	0.48	0.073	1.56e-136	7	Nr4a1
1588	5.24e-229	1.52982	0.571	0.065	8.53e-225	7	Cd7
1589	3.94e-149	1.52538	0.895	0.264	6.41e-145	7	Gng10
1590	6.91e-20	1.50405	0.609	0.363	1.13e-15	7	Rgs1
1591	1.35e-70	1.49975	0.993	0.919	2.2e-66	7	Fth1
1592	0	1.47489	0.626	0.004	0	7	Pld4
1593	1.54e-97	1.46942	0.939	0.414	2.51e-93	7	Atox1
1594	2.01e-71	1.45081	0.575	0.174	3.28e-67	7	Dusp1
1595	0	1.44277	0.252	0.001	0	7	Mmp12
1596	0	1.42808	0.616	0.034	0	7	Grn
1597	5.07e-69	1.42191	0.313	0.059	8.25e-65	7	Ctsl
1598	1.13e-123	1.41671	0.765	0.196	1.84e-119	7	Neat1
1599	0	1.39758	0.561	0.001	0	7	Rnd3
1600	3.1e-96	1.39328	0.874	0.31	5.05e-92	7	Ier5
1601	2.63e-116	1.39187	0.925	0.363	4.29e-112	7	Taldo1
1602	6.26e-254	1.38563	0.432	0.032	1.02e-249	7	Fosb
1603	0	1.35908	0.33	0.001	0	7	Wfdc17
1604	2.31e-144	1.33297	0.854	0.231	3.76e-140	7	Erp29
1605	0	1.31371	0.378	0.004	0	7	Havcr2
1606	0	1.30746	0.401	0.016	0	7	Tmem176a
1607	0	1.30637	0.418	0.001	0	7	Cd209a
1608	2.61e-79	1.2951	0.976	0.789	4.26e-75	7	Ftl1
1609	7.16e-257	1.29216	0.724	0.091	1.17e-252	7	Lmo4
1610	3.13e-101	1.28268	0.929	0.378	5.1e-97	7	Ctss
1611	2.51e-29	1.2777	0.728	0.46	4.08e-25	7	Vim
1612	0	1.27335	0.486	0.014	0	7	Klf4
1613	0	1.26607	0.541	0.008	0	7	Cbfa2t3
1614	1.01e-49	1.26245	1	0.892	1.65e-45	7	H3f3b
1615	1.22e-168	1.25321	0.524	0.072	1.98e-164	7	Anxa2
1616	0	1.25298	0.51	0.016	0	7	Kctd12
1617	2.15e-47	1.24303	0.901	0.502	3.5e-43	7	Junb
1618	0	1.2427	0.446	0.003	0	7	Clec12a
1619	6.93e-77	1.24266	0.969	0.625	1.13e-72	7	Sub1
1620	0	1.23492	0.289	0.001	0	7	Bcl2a1a
1621	0	1.23361	0.636	0.051	0	7	Evi2a
1622	0	1.23146	0.578	0.003	0	7	Cd300a
1623	0	1.22972	0.677	0.05	0	7	Skap2
1624	7.54e-76	1.22215	0.752	0.264	1.23e-71	7	Ier2
1625	0	1.21789	0.554	0.003	0	7	Pkib
1626	4.06e-191	1.21289	0.531	0.066	6.62e-187	7	Ckb
1627	5.24e-233	1.20776	0.741	0.108	8.53e-229	7	Syngr2
1628	0	1.19796	0.286	0.001	0	7	Ppp1r14a
1629	0	1.19081	0.599	0.008	0	7	Plekho1
1630	3.08e-248	1.18608	0.262	0.01	5.01e-244	7	Rasgef1b
1631	0	1.1854	0.588	0.008	0	7	Cd68
1632	7.01e-299	1.18301	0.425	0.025	1.14e-294	7	Avpi1
1633	0	1.18299	0.507	0.001	0	7	I830077J02Rik
1634	8.18e-237	1.1803	0.469	0.041	1.33e-232	7	H2-Oa
1635	0	1.17926	0.561	0.004	0	7	Pirb
1636	3.58e-108	1.17537	0.483	0.092	5.83e-104	7	Bcl2a1d
1637	0	1.16985	0.327	0.001	0	7	Gm6377
1638	1.84e-68	1.16775	0.724	0.262	2.99e-64	7	Ctsb
1639	0	1.14859	0.371	0.009	0	7	Anxa1
1640	2.95e-143	1.1442	0.5	0.077	4.8e-139	7	Gngt2
1641	0	1.14247	0.306	0.002	0	7	Dnase1l3
1642	0	1.13251	0.558	0.016	0	7	Jaml
1643	0	1.12489	0.418	0.002	0	7	Cd300c2
1644	0	1.11307	0.323	0.005	0	7	Kit
1645	5.05e-87	1.10888	0.922	0.373	8.23e-83	7	Gdi2
1646	0	1.10772	0.493	0.027	0	7	Tctex1d2
1647	0	1.10637	0.442	0.002	0	7	Batf3
1648	0	1.10507	0.388	0.001	0	7	Ifitm6
1649	0	1.10003	0.558	0.005	0	7	Rassf4
1650	0	1.09817	0.497	0.016	0	7	Pak1
1651	0	1.08665	0.405	0.006	0	7	Ciita
1652	0	1.08346	0.354	0.012	0	7	Basp1
1653	0	1.08314	0.527	0.001	0	7	Ppfia4
1654	0	1.07717	0.429	0.02	0	7	Hk2
1655	0	1.07453	0.316	0.001	0	7	Ccl6
1656	7.08e-42	1.07064	0.429	0.145	1.15e-37	7	Id2
1657	2.26e-127	1.0705	0.741	0.173	3.69e-123	7	Pip4k2a
1658	9.16e-260	1.07006	0.364	0.021	1.49e-255	7	Lair1
1659	5.37e-111	1.05858	0.827	0.241	8.74e-107	7	Ostf1
1660	3.92e-151	1.05012	0.779	0.172	6.38e-147	7	Atp6v0b
1661	5.61e-172	1.04968	0.367	0.034	9.13e-168	7	Ahr
1662	3.28e-71	1.04406	0.969	0.527	5.34e-67	7	Arpc1b
1663	3.39e-45	1.04331	0.741	0.367	5.52e-41	7	Tagln2
1664	1.02e-123	1.0431	0.806	0.211	1.66e-119	7	Mtpn
1665	0	1.04146	0.412	0.001	0	7	Itgax
1666	0	1.0393	0.425	0.004	0	7	Fcgrt
1667	6.31e-72	1.03625	0.963	0.634	1.03e-67	7	Lsp1
1668	0	1.03588	0.568	0.038	0	7	Ccdc88a
1669	0	1.03511	0.459	0.002	0	7	Grk3
1670	0	1.0217	0.446	0.002	0	7	Pid1
1671	0	1.01826	0.551	0.029	0	7	Gsn
1672	0	1.00925	0.463	0.007	0	7	Fgr
1673	5.07e-110	0.99697	0.769	0.207	8.26e-106	7	Man2b1
1674	4.25e-110	0.996244	0.595	0.127	6.92e-106	7	Filip1l
1675	0	0.987564	0.432	0.003	0	7	Wdfy4
1676	1.94e-45	0.985146	0.704	0.313	3.16e-41	7	Pgls
1677	0	0.97765	0.354	0.001	0	7	Tnni2
1678	3.69e-108	0.976301	0.446	0.077	6.01e-104	7	Bhlhe40
1679	1.95e-143	0.962253	0.347	0.037	3.18e-139	7	Runx2
1680	0	0.961644	0.456	0.009	0	7	Syk
1681	4.35e-61	0.960118	0.779	0.294	7.09e-57	7	Klf6
1682	0	0.959245	0.578	0.042	0	7	Rnf130
1683	2.89e-94	0.947198	0.673	0.18	4.7e-90	7	Efhd2
1684	3.09e-63	0.941534	0.986	0.833	5.04e-59	7	H3f3a
1685	6.35e-86	0.940658	0.847	0.29	1.03e-81	7	Ptms
1686	0	0.932136	0.333	0.011	0	7	Ccnd1
1687	3.82e-199	0.930494	0.609	0.08	6.21e-195	7	Stx7
1688	1.81e-138	0.925039	0.527	0.084	2.95e-134	7	Lyst
1689	0	0.920244	0.429	0.011	0	7	Shtn1
1690	0	0.917703	0.35	0.004	0	7	Siglecg
1691	2.74e-57	0.916268	0.803	0.341	4.46e-53	7	Tspan13
1692	0	0.916128	0.259	0.001	0	7	Adam23
1693	6.48e-29	0.914556	0.629	0.332	1.05e-24	7	Lgals1
1694	4.67e-188	0.912914	0.643	0.094	7.6e-184	7	Fam174a
1695	0	0.910255	0.384	0.002	0	7	Kmo
1696	1.36e-116	0.908235	0.609	0.127	2.22e-112	7	Uvrag
1697	0	0.904304	0.442	0.003	0	7	Themis2
1698	0	0.901108	0.384	0.007	0	7	Myadm
1699	1.04e-26	0.900098	0.81	0.447	1.69e-22	7	Nfkbia
1700	0	0.898218	0.463	0.006	0	7	Ogfrl1
1701	0	0.892684	0.357	0.002	0	7	Gpr141
1702	8.81e-65	0.88824	0.922	0.428	1.43e-60	7	Capza2
1703	0	0.887581	0.463	0.011	0	7	Lmo2
1704	3.37e-62	0.886071	0.554	0.17	5.5e-58	7	Ppp1r15a
1705	0	0.886067	0.282	0.002	0	7	Pltp
1706	0	0.885519	0.429	0.005	0	7	Pira2
1707	9.79e-97	0.879036	0.728	0.2	1.59e-92	7	Rrbp1
1708	0	0.874738	0.486	0.002	0	7	Nfam1
1709	0	0.874607	0.432	0.008	0	7	App
1710	0	0.873053	0.435	0.009	0	7	Ncf2
1711	1.88e-44	0.869631	0.772	0.35	3.07e-40	7	Mdh2
1712	4.72e-32	0.86088	0.534	0.227	7.69e-28	7	Bcl2a1b
1713	7.53e-102	0.860641	0.765	0.207	1.23e-97	7	Ptpn6
1714	3.18e-51	0.859273	0.704	0.263	5.17e-47	7	Rel
1715	1.43e-82	0.853942	0.432	0.088	2.33e-78	7	Dennd4a
1716	0	0.852556	0.418	0.007	0	7	Lat2
1717	4.34e-69	0.851351	0.721	0.24	7.07e-65	7	Serp1
1718	0	0.845178	0.371	0.004	0	7	Sirpa
1719	7.84e-87	0.844479	0.663	0.177	1.28e-82	7	Dapp1
1720	0	0.843614	0.415	0.001	0	7	Rgs18
1721	0	0.843329	0.422	0.004	0	7	2023-03-01
1722	0	0.841327	0.299	0.002	0	7	Arhgap6
1723	3.2e-133	0.837084	0.432	0.059	5.21e-129	7	Ms4a4c
1724	6.34e-81	0.834991	0.667	0.196	1.03e-76	7	Anxa5
1725	0	0.832147	0.361	0.002	0	7	Clec4a2
1726	8.85e-84	0.82507	0.585	0.148	1.44e-79	7	Spag9
1727	0	0.823584	0.425	0.003	0	7	Fgd2
1728	8.71e-45	0.819505	0.762	0.331	1.42e-40	7	Dnajc7
1729	4.35e-87	0.81562	0.378	0.067	7.08e-83	7	Nucb2
1730	7.91e-270	0.813165	0.425	0.028	1.29e-265	7	Cyb561a3
1731	2.59e-54	0.810596	0.925	0.48	4.22e-50	7	H2afy
1732	0	0.807948	0.395	0.003	0	7	Cd180
1733	2.23e-121	0.807838	0.554	0.103	3.63e-117	7	Ctsc
1734	3.02e-71	0.806131	0.517	0.133	4.91e-67	7	Runx3
1735	0	0.802609	0.398	0.009	0	7	Cfp
1736	0	0.802035	0.303	0	0	7	Sirpb1c
1737	0	0.79856	0.306	0.006	0	7	Aif1
1738	0	0.794704	0.282	0.003	0	7	Upb1
1739	4.36e-91	0.794691	0.762	0.22	7.1e-87	7	Bri3
1740	2.77e-47	0.792532	0.616	0.219	4.51e-43	7	Malt1
1741	0	0.792147	0.354	0.002	0	7	Hck
1742	0	0.79003	0.282	0.001	0	7	1600010M07Rik
1743	4.24e-80	0.780786	0.663	0.189	6.9e-76	7	Ifnar2
1744	1.7e-79	0.780218	0.262	0.037	2.77e-75	7	Ccl5
1745	0	0.779154	0.408	0.011	0	7	Csf2ra
1746	4.31e-171	0.778437	0.483	0.059	7.02e-167	7	Alcam
1747	1.33e-92	0.775783	0.378	0.063	2.16e-88	7	Map3k8
1748	0	0.772341	0.415	0.001	0	7	Tifab
1749	6.6e-162	0.770574	0.531	0.073	1.08e-157	7	Bmp2k
1750	2.91e-45	0.768591	0.942	0.558	4.74e-41	7	Arpc3
1751	0	0.761552	0.361	0.006	0	7	Pik3ap1
1752	7.04e-102	0.760818	0.31	0.041	1.15e-97	7	Chka
1753	0	0.759992	0.398	0.002	0	7	Flt3
1754	0	0.75597	0.286	0.008	0	7	Cyp4f16
1755	2.88e-111	0.752769	0.548	0.108	4.69e-107	7	Plp2
1756	2.67e-27	0.746921	1	0.998	4.34e-23	7	Gm42418
1757	5.64e-128	0.74622	0.602	0.114	9.19e-124	7	Ctsa
1758	1.71e-85	0.744052	0.578	0.143	2.79e-81	7	Oser1
1759	1.05e-278	0.742438	0.337	0.016	1.71e-274	7	Nedd4
1760	2.12e-131	0.741831	0.456	0.066	3.45e-127	7	Nrros
1761	3.65e-194	0.741546	0.299	0.019	5.94e-190	7	Ifi44
1762	4.79e-94	0.740837	0.602	0.142	7.8e-90	7	Dleu2
1763	0	0.738219	0.31	0.007	0	7	Klrd1
1764	4.5e-135	0.738102	0.497	0.077	7.33e-131	7	Prkcd
1765	2.12e-34	0.734065	0.942	0.63	3.45e-30	7	Sec61b
1766	1.3e-115	0.73261	0.588	0.118	2.12e-111	7	Creg1
1767	0	0.73078	0.415	0.014	0	7	Ncf1
1768	1.95e-37	0.730731	0.446	0.155	3.18e-33	7	Ifrd1
1769	7.97e-101	0.729869	0.48	0.09	1.3e-96	7	Fam49a
1770	0	0.729543	0.449	0.02	0	7	Irf5
1771	1.62e-87	0.724298	0.561	0.133	2.64e-83	7	Arhgap17
1772	0	0.715768	0.347	0.013	0	7	Trf
1773	7.84e-78	0.712553	0.405	0.082	1.28e-73	7	Rhob
1774	2.38e-54	0.711799	0.782	0.315	3.87e-50	7	Atp6v0c
1775	1.13e-98	0.711293	0.582	0.129	1.85e-94	7	Trappc5
1776	0	0.710986	0.35	0.002	0	7	Csf2rb
1777	3.15e-111	0.709011	0.599	0.124	5.12e-107	7	Nptn
1778	5.82e-63	0.707328	0.83	0.319	9.48e-59	7	Atp6v1g1
1779	0	0.706987	0.276	0.005	0	7	Cadm1
1780	1.28e-79	0.70303	0.497	0.115	2.08e-75	7	Ybx3
1781	1.47e-108	0.702881	0.493	0.091	2.39e-104	7	Tmed3
1782	2.61e-81	0.700864	0.544	0.133	4.25e-77	7	Zyx
1783	6.14e-54	0.699913	0.697	0.252	1e-49	7	Ubc
1784	8.34e-277	0.698052	0.381	0.021	1.36e-272	7	Ehd4
1785	7.69e-104	0.697598	0.554	0.113	1.25e-99	7	Mapkapk2
1786	8.44e-38	0.695737	0.384	0.12	1.37e-33	7	Cebpb
1787	0	0.694308	0.289	0.002	0	7	Scimp
1788	5.9e-26	0.69268	0.949	0.639	9.61e-22	7	Jund
1789	9.71e-85	0.690906	0.609	0.156	1.58e-80	7	Bloc1s2
1790	8.46e-83	0.690336	0.66	0.18	1.38e-78	7	Rala
1791	5.57e-277	0.688094	0.313	0.013	9.06e-273	7	Rogdi
1792	1.28e-158	0.684252	0.442	0.053	2.09e-154	7	Tpd52
1793	0	0.683911	0.327	0.002	0	7	BC028528
1794	3.25e-63	0.683681	0.558	0.161	5.3e-59	7	Snx20
1795	3.37e-263	0.678485	0.344	0.018	5.49e-259	7	Slc46a3
1796	1.68e-46	0.677482	0.847	0.394	2.74e-42	7	Rap1a
1797	0	0.674115	0.255	0.001	0	7	Gm5150
1798	1.99e-257	0.673293	0.32	0.016	3.25e-253	7	Arsb
1799	1.65e-25	0.671986	0.293	0.099	2.68e-21	7	Cd83
1800	8.15e-48	0.671258	0.871	0.397	1.33e-43	7	Sh3glb1
1801	1.76e-161	0.669456	0.401	0.043	2.87e-157	7	Myo1f
1802	1.42e-130	0.669092	0.425	0.059	2.31e-126	7	Rab43
1803	1.94e-62	0.66492	0.575	0.168	3.16e-58	7	Stap1
1804	0	0.66471	0.259	0.001	0	7	Eps8
1805	6.69e-35	0.664459	0.85	0.437	1.09e-30	7	Rnaset2a
1806	2.02e-167	0.661715	0.398	0.041	3.28e-163	7	Clic4
1807	4.05e-260	0.658042	0.391	0.024	6.59e-256	7	Asah1
1808	9.83e-15	0.657056	0.626	0.441	1.6e-10	7	Ahnak
1809	1.41e-290	0.656855	0.344	0.016	2.29e-286	7	Tm6sf1
1810	3.55e-146	0.653542	0.357	0.038	5.79e-142	7	Slamf7
1811	3.72e-31	0.652931	0.949	0.68	6.05e-27	7	Cyba
1812	8.25e-42	0.652741	0.741	0.322	1.34e-37	7	St8sia4
1813	1.03e-44	0.652623	0.891	0.471	1.67e-40	7	Atp6v0e
1814	8.62e-42	0.650767	0.361	0.104	1.4e-37	7	Msrb1
1815	2.4e-77	0.649813	0.602	0.161	3.9e-73	7	Herpud1
1816	2.17e-210	0.649535	0.384	0.03	3.53e-206	7	Ctnna1
1817	3.82e-54	0.647036	0.561	0.179	6.22e-50	7	Snx5
1818	1.13e-288	0.646998	0.371	0.019	1.83e-284	7	Plekhm3
1819	2.96e-111	0.645293	0.575	0.115	4.82e-107	7	Fuca1
1820	0	0.64259	0.327	0.009	0	7	BC035044
1821	4.62e-52	0.641877	0.905	0.378	7.53e-48	7	Tgfb1
1822	1.02e-196	0.641763	0.286	0.017	1.67e-192	7	Fgl2
1823	8.88e-139	0.640491	0.364	0.041	1.45e-134	7	Tep1
1824	7.49e-50	0.632628	0.697	0.264	1.22e-45	7	Gpr183
1825	1.49e-134	0.628721	0.33	0.035	2.43e-130	7	Cd86
1826	4.17e-109	0.62264	0.507	0.094	6.79e-105	7	Lamp2
1827	1.27e-175	0.622006	0.255	0.015	2.07e-171	7	Cd24a
1828	4.77e-45	0.621703	0.925	0.459	7.77e-41	7	Clta
1829	4.16e-147	0.619639	0.333	0.033	6.77e-143	7	Aldh2
1830	0	0.61802	0.255	0.002	0	7	Igsf6
1831	4.86e-229	0.617758	0.374	0.026	7.92e-225	7	Rp2
1832	8.6e-123	0.616482	0.361	0.045	1.4e-118	7	Tent5a
1833	0	0.615526	0.282	0.005	0	7	Cd244a
1834	0	0.615471	0.327	0.005	0	7	Nav1
1835	8.97e-63	0.611233	0.558	0.159	1.46e-58	7	Zfand5
1836	7.95e-42	0.610396	0.616	0.233	1.29e-37	7	Ppp1r10
1837	4.31e-182	0.607638	0.439	0.045	7.02e-178	7	Sgk3
1838	3.62e-27	0.605523	0.915	0.621	5.89e-23	7	Gnas
1839	5.89e-44	0.6055	0.476	0.156	9.59e-40	7	Ppt1
1840	2.73e-42	0.605118	0.578	0.21	4.45e-38	7	Slc38a1
1841	7.24e-48	0.60478	0.847	0.358	1.18e-43	7	Vamp8
1842	4.23e-100	0.599157	0.296	0.037	6.9e-96	7	Tsc22d1
1843	2.61e-67	0.599157	0.412	0.093	4.25e-63	7	Pafah1b3
1844	3.67e-88	0.597088	0.439	0.084	5.98e-84	7	Baz2b
1845	2.99e-15	0.596452	0.442	0.229	4.87e-11	7	Ly6e
1846	3.6e-278	0.593926	0.354	0.018	5.86e-274	7	Sap30
1847	4.33e-53	0.593083	0.677	0.243	7.06e-49	7	Mkrn1
1848	8.33e-238	0.586433	0.371	0.024	1.36e-233	7	5031439G07Rik
1849	2.68e-12	0.582457	0.85	0.566	4.37e-08	7	Klf2
1850	4.48e-34	0.580667	0.956	0.602	7.29e-30	7	Ybx1
1851	5.56e-24	0.580157	0.908	0.596	9.05e-20	7	Mcl1
1852	0	0.578946	0.293	0.002	0	7	Cdk14
1853	1.4e-44	0.578694	0.861	0.393	2.27e-40	7	Gnb2
1854	8.54e-78	0.57476	0.357	0.065	1.39e-73	7	Plxnc1
1855	1.92e-116	0.57116	0.507	0.088	3.13e-112	7	Bri3bp
1856	2.36e-65	0.570622	0.588	0.17	3.84e-61	7	Ubl3
1857	0	0.569578	0.286	0.003	0	7	Cebpd
1858	2.19e-182	0.569279	0.333	0.026	3.56e-178	7	Slc15a4
1859	5.24e-41	0.565379	0.837	0.386	8.53e-37	7	Iqgap1
1860	1.3e-36	0.561739	0.844	0.398	2.12e-32	7	Sec11c
1861	3.1e-43	0.561704	0.653	0.254	5.05e-39	7	Cd2ap
1862	2.49e-80	0.558883	0.551	0.134	4.06e-76	7	Eid1
1863	0	0.556983	0.333	0.006	0	7	Btk
1864	1.26e-38	0.554017	0.656	0.26	2.06e-34	7	Picalm
1865	8.4e-29	0.553884	0.915	0.588	1.37e-24	7	Cd47
1866	4.53e-61	0.552639	0.459	0.118	7.38e-57	7	Tmem131l
1867	1.4e-20	0.552461	0.925	0.616	2.28e-16	7	Lcp1
1868	0	0.552166	0.279	0.002	0	7	Haao
1869	3.14e-67	0.551603	0.517	0.134	5.11e-63	7	Ptpre
1870	6.58e-26	0.551066	0.976	0.77	1.07e-21	7	Calm1
1871	1.93e-80	0.546418	0.531	0.124	3.15e-76	7	Ttc7
1872	4.37e-63	0.545892	0.425	0.103	7.12e-59	7	Dap
1873	0	0.542207	0.259	0.004	0	7	Rgl1
1874	5.2e-94	0.542141	0.442	0.081	8.47e-90	7	Pip4p1
1875	4.21e-186	0.542019	0.357	0.029	6.85e-182	7	Dpy19l1
1876	0	0.541946	0.303	0.002	0	7	Fes
1877	0	0.540817	0.265	0.001	0	7	Tbc1d8
1878	9.03e-29	0.539325	0.864	0.456	1.47e-24	7	Slc38a2
1879	7.64e-26	0.538947	0.327	0.115	1.24e-21	7	Atp1b1
1880	4.51e-178	0.537498	0.333	0.026	7.34e-174	7	Snx9
1881	2.26e-144	0.536137	0.313	0.029	3.67e-140	7	Hmgn3
1882	1.57e-87	0.534073	0.534	0.118	2.55e-83	7	Dipk1a
1883	3.6e-97	0.532515	0.429	0.075	5.86e-93	7	Lactb
1884	5.63e-66	0.532227	0.677	0.208	9.17e-62	7	Srsf9
1885	8.89e-100	0.529302	0.432	0.074	1.45e-95	7	Ifngr2
1886	1.44e-88	0.527693	0.347	0.055	2.34e-84	7	Bach1
1887	1.76e-34	0.526042	0.861	0.441	2.87e-30	7	Smdt1
1888	4.79e-31	0.525181	0.888	0.475	7.79e-27	7	Pomp
1889	2.02e-37	0.521094	0.741	0.324	3.29e-33	7	Irf2bp2
1890	1.08e-112	0.520451	0.415	0.063	1.76e-108	7	Cuedc2
1891	9.88e-38	0.517761	0.84	0.397	1.61e-33	7	Capzb
1892	1.22e-105	0.517028	0.371	0.054	1.98e-101	7	Pepd
1893	1.01e-32	0.515086	0.755	0.358	1.65e-28	7	Reep5
1894	7.02e-62	0.512704	0.374	0.083	1.14e-57	7	Irf7
1895	1.32e-85	0.511317	0.337	0.054	2.15e-81	7	Dstn
1896	2.78e-48	0.510221	0.718	0.274	4.52e-44	7	Akr1a1
1897	3.87e-146	0.508355	0.344	0.034	6.3e-142	7	St3gal4
1898	1.66e-58	0.507861	0.279	0.053	2.7e-54	7	Tiparp
1899	7.67e-39	0.507335	0.476	0.161	1.25e-34	7	Dusp5
1900	3.44e-80	0.506971	0.432	0.089	5.61e-76	7	Fh1
1901	0	0.506429	0.286	0.004	0	7	Plcg2
1902	3.43e-204	0.505874	0.269	0.014	5.59e-200	7	Pkig
1903	3.25e-57	0.505724	0.592	0.183	5.29e-53	7	Ncf4
1904	0	0.50479	0.279	0.003	0	7	Lrrk1
1905	2.22e-28	0.504702	0.401	0.146	3.62e-24	7	Tagap
1906	5.87e-28	0.504017	0.976	0.769	9.56e-24	7	Arpc2
1907	1.02e-28	0.502663	0.932	0.579	1.66e-24	7	Rhoa
1908	1.25e-77	0.502083	0.412	0.084	2.04e-73	7	Tmem219
1909	6.93e-29	0.499993	0.929	0.612	1.13e-24	7	Ucp2
1910	2.01e-55	0.499646	0.779	0.28	3.27e-51	7	Atxn7l3b
1911	2.96e-42	0.498667	0.265	0.061	4.82e-38	7	Trib1
1912	2.42e-56	0.498178	0.626	0.197	3.94e-52	7	Cyth4
1913	2.55e-52	0.492759	0.687	0.242	4.15e-48	7	Tmem256
1914	6.37e-125	0.492727	0.32	0.035	1.04e-120	7	Prcp
1915	2.13e-142	0.492288	0.344	0.036	3.46e-138	7	Atf6
1916	1.57e-26	0.491886	0.667	0.315	2.55e-22	7	Prdx5
1917	6.3e-30	0.49055	0.789	0.388	1.03e-25	7	Dock10
1918	1.27e-45	0.488351	0.493	0.156	2.07e-41	7	Mef2a
1919	0	0.487409	0.272	0.002	0	7	Adgrg5
1920	1.27e-39	0.486609	0.748	0.317	2.07e-35	7	Tmed10
1921	9.84e-38	0.482328	0.66	0.266	1.6e-33	7	Ifngr1
1922	2.86e-122	0.479922	0.35	0.042	4.66e-118	7	Scpep1
1923	1.29e-29	0.479626	0.986	0.867	2.1e-25	7	Serf2
1924	1.29e-123	0.477782	0.361	0.044	2.1e-119	7	Hexa
1925	5.36e-12	0.47778	0.524	0.299	8.73e-08	7	Traf1
1926	1.22e-33	0.475985	0.813	0.395	1.99e-29	7	Ywhae
1927	2.62e-27	0.473133	0.827	0.435	4.27e-23	7	Ssr4
1928	9.7e-31	0.471011	0.673	0.297	1.58e-26	7	Jmjd1c
1929	8.02e-42	0.468572	0.759	0.308	1.31e-37	7	Grb2
1930	3.44e-83	0.468267	0.422	0.081	5.6e-79	7	Camk1d
1931	3.53e-28	0.467897	0.908	0.531	5.75e-24	7	H2afj
1932	1.57e-89	0.46703	0.381	0.065	2.56e-85	7	Tm2d2
1933	5.18e-35	0.466222	0.456	0.158	8.43e-31	7	Nfkbiz
1934	0	0.465267	0.259	0.005	0	7	Hhex
1935	4.98e-33	0.464687	0.755	0.357	8.11e-29	7	Pitpna
1936	3.85e-110	0.463237	0.276	0.029	6.27e-106	7	Acer3
1937	3.14e-26	0.462438	0.963	0.663	5.11e-22	7	Cdc42
1938	3.11e-60	0.461978	0.459	0.118	5.06e-56	7	Slk
1939	2.02e-26	0.461818	0.361	0.129	3.29e-22	7	Mast4
1940	2.03e-25	0.460597	0.946	0.651	3.3e-21	7	Gnai2
1941	9.98e-36	0.460596	0.415	0.138	1.63e-31	7	Gm20186
1942	1.61e-27	0.460533	0.908	0.511	2.62e-23	7	Arpc5
1943	7.01e-61	0.460378	0.561	0.16	1.14e-56	7	Ssr1
1944	4.82e-22	0.458839	0.293	0.106	7.85e-18	7	Gadd45b
1945	1.91e-61	0.458798	0.418	0.099	3.11e-57	7	Mapk14
1946	2.57e-59	0.456654	0.595	0.177	4.19e-55	7	Inpp5d
1947	2.7e-43	0.45601	0.684	0.262	4.4e-39	7	Gltp
1948	7.64e-25	0.455891	0.867	0.486	1.24e-20	7	Hspa5
1949	7.28e-30	0.455866	0.748	0.354	1.19e-25	7	Ndufb8
1950	2.55e-85	0.454519	0.364	0.062	4.15e-81	7	Plekho2
1951	1.51e-40	0.454331	0.793	0.334	2.45e-36	7	Atpif1
1952	1.59e-38	0.452617	0.714	0.293	2.6e-34	7	Hcls1
1953	7.78e-52	0.450805	0.367	0.091	1.27e-47	7	Fdps
1954	1.19e-60	0.450475	0.497	0.134	1.94e-56	7	Tmem147
1955	5.99e-88	0.450057	0.33	0.051	9.76e-84	7	Ube2e3
1956	7.45e-41	0.4487	0.738	0.298	1.21e-36	7	Tmem160
1957	7.65e-67	0.446827	0.568	0.154	1.25e-62	7	Rnh1
1958	3.56e-35	0.446628	0.827	0.376	5.8e-31	7	Arpc4
1959	1.67e-63	0.444472	0.466	0.115	2.72e-59	7	Notch2
1960	4.24e-35	0.443661	0.735	0.315	6.9e-31	7	M6pr
1961	7.97e-79	0.443638	0.418	0.083	1.3e-74	7	Itpr1
1962	3.88e-50	0.442829	0.609	0.199	6.31e-46	7	Tmed5
1963	1.25e-52	0.442781	0.605	0.197	2.03e-48	7	Rtn4
1964	1.07e-64	0.441929	0.442	0.105	1.74e-60	7	Cyfip1
1965	1.96e-42	0.439554	0.629	0.233	3.19e-38	7	Otulinl
1966	2.08e-58	0.438527	0.422	0.106	3.38e-54	7	Atp6ap2
1967	6.63e-59	0.438258	0.537	0.153	1.08e-54	7	Gng2
1968	1.13e-38	0.438041	0.537	0.195	1.84e-34	7	Ech1
1969	1.51e-82	0.435294	0.391	0.071	2.45e-78	7	Dnajb14
1970	1.16e-24	0.43481	0.837	0.461	1.88e-20	7	Nap1l1
1971	1.49e-41	0.432164	0.517	0.175	2.43e-37	7	Iscu
1972	1.82e-20	0.429646	0.925	0.561	2.97e-16	7	Tpm3
1973	6.11e-39	0.428331	0.646	0.253	9.95e-35	7	Uqcrfs1
1974	7.97e-24	0.427998	0.884	0.492	1.3e-19	7	Atp5f1
1975	6.1e-30	0.427809	0.65	0.285	9.93e-26	7	Ywhah
1976	6.86e-81	0.426936	0.418	0.082	1.12e-76	7	Unc119
1977	1.9e-41	0.4262	0.585	0.21	3.1e-37	7	Taok3
1978	4.78e-44	0.425322	0.558	0.188	7.79e-40	7	Atf4
1979	3.29e-112	0.42476	0.364	0.049	5.35e-108	7	Slc35c2
1980	2.3e-38	0.423785	0.575	0.213	3.75e-34	7	Smap2
1981	1.85e-80	0.423276	0.252	0.033	3.01e-76	7	Map1lc3a
1982	1.59e-49	0.422778	0.286	0.062	2.59e-45	7	Sgk1
1983	5.51e-99	0.42238	0.32	0.043	8.98e-95	7	Naga
1984	2.71e-41	0.421605	0.626	0.235	4.41e-37	7	Sptssa
1985	8.31e-18	0.420469	0.966	0.675	1.35e-13	7	H2afz
1986	6.22e-45	0.418994	0.66	0.24	1.01e-40	7	Dbnl
1987	1.13e-48	0.418944	0.544	0.174	1.83e-44	7	Bnip2
1988	7.38e-23	0.4181	0.803	0.44	1.2e-18	7	Itga4
1989	1.7e-51	0.413465	0.493	0.145	2.77e-47	7	Epn1
1990	7.23e-35	0.413008	0.544	0.21	1.18e-30	7	Vrk1
1991	2.81e-59	0.41121	0.486	0.129	4.57e-55	7	Stx16
1992	4.02e-25	0.410085	0.891	0.491	6.55e-21	7	Tln1
1993	3.63e-46	0.408693	0.605	0.207	5.92e-42	7	Rbpj
1994	8.5e-53	0.407298	0.289	0.06	1.38e-48	7	Net1
1995	8.93e-31	0.40722	0.82	0.398	1.45e-26	7	Fam49b
1996	5.26e-50	0.405895	0.582	0.188	8.57e-46	7	Cnih4
1997	2.14e-46	0.405757	0.541	0.176	3.48e-42	7	Baz1a
1998	2.81e-34	0.405619	0.762	0.33	4.57e-30	7	Vdac2
1999	6.33e-26	0.404171	0.721	0.352	1.03e-21	7	Serinc3
[truncated: 2,298 more rows]
